# Supplementary material
Source: PubMed Central journal article supplement (PMC11170452)
Supplement: jama-e249779-s004.pdf [file jama-e249779-s004.pdf]

\*First name, last name, and suffix (if applicable) are required and will appear in PubMed.

| <b>*Group Name(s): BLING III Study Investigators</b> |                   |                              |                  |                    |                                                  |                                                         |                                                                                            |
|------------------------------------------------------|-------------------|------------------------------|------------------|--------------------|--------------------------------------------------|---------------------------------------------------------|--------------------------------------------------------------------------------------------|
| <b>*First Name and Middle Initial(s)</b>             | <b>*Last Name</b> | <b>*Suffix (eg, Jr, III)</b> | Academic Degrees | Institution        | Location (city, state/province, country)         | Role or Contribution, eg, chair, principal investigator | Group (if more than 1 Group listed in the byline) and/or Subgroup (eg, Steering Committee) |
| Rinaldo                                              | Bellomo           |                              |                  | Austin Hospital    | Melbourne, Victoria, Australia                   | Principal Investigator                                  |                                                                                            |
| Glenn                                                | Eastwood          |                              |                  | Austin Hospital    | Melbourne, Victoria, Australia                   | Research Coordinator                                    |                                                                                            |
| Leah                                                 | Peck              |                              |                  | Austin Hospital    | Melbourne, Victoria, Australia                   | Research Coordinator                                    |                                                                                            |
| Helen                                                | Young             |                              |                  | Austin Hospital    | Melbourne, Victoria, Australia                   | Research Coordinator                                    |                                                                                            |
| Andrew                                               | Cheng             |                              |                  | Bankstown Hospital | South Western Sydney, New South Wales, Australia | Principal Investigator                                  |                                                                                            |
| Luke                                                 | Lau               |                              |                  | Bankstown Hospital | South Western Sydney, New South Wales, Australia | Principal Investigator                                  |                                                                                            |
| Magdalena                                            | Luciuk            |                              |                  | Bankstown Hospital | South Western Sydney, New South Wales, Australia | Research Coordinator                                    |                                                                                            |
| Margaret                                             | Muteitha          |                              |                  | Bankstown Hospital | South Western Sydney, New South Wales, Australia | Research Coordinator                                    |                                                                                            |
| Manoj                                                | Saxena            |                              |                  | Bankstown Hospital | South Western Sydney, New South Wales, Australia | Principal Investigator                                  |                                                                                            |
| Catherine                                            | Boschert          |                              |                  | Bendigo Hospital   | Bendigo, Victoria, Australia                     | Research Coordinator                                    |                                                                                            |
| Timothy                                              | Chimunda          |                              |                  | Bendigo Hospital   | Bendigo, Victoria, Australia                     | Principal Investigator                                  |                                                                                            |
| Cameron                                              | Knott             |                              |                  | Bendigo Hospital   | Bendigo, Victoria, Australia                     | Principal Investigator                                  |                                                                                            |

## Supplemental Online Content: Nonauthor Collaborators

\*First name, last name, and suffix (if applicable) are required and will appear in PubMed.

| *First Name and Middle Initial(s) | *Last Name | *Suffix (eg, Jr, III) | Academic Degrees | Institution               | Location (city, state/province, country)   | Role or Contribution, eg, chair, principal investigator | Group (if more than 1 Group listed in the byline) and/or Subgroup (eg, Steering Committee) |
|-----------------------------------|------------|-----------------------|------------------|---------------------------|--------------------------------------------|---------------------------------------------------------|--------------------------------------------------------------------------------------------|
| Julie                             | Smith      |                       |                  | Bendigo Hospital          | Bendigo, Victoria, Australia               | Research Coordinator                                    |                                                                                            |
| Kiran                             | Nand       |                       |                  | Blacktown Hospital        | Western Sydney, New South Wales, Australia | Research Coordinator                                    |                                                                                            |
| Treena                            | Sara       |                       |                  | Blacktown Hospital        | Western Sydney, New South Wales, Australia | Research Coordinator                                    |                                                                                            |
| Peter                             | Chan       |                       |                  | Box Hill (Eastern Health) | Eastern Melbourne, Victoria, Australia     | Principal Investigator                                  |                                                                                            |
| Graeme                            | Duke       |                       |                  | Box Hill (Eastern Health) | Eastern Melbourne, Victoria, Australia     | Principal Investigator                                  |                                                                                            |
| John                              | Dyett      |                       |                  | Box Hill (Eastern Health) | Eastern Melbourne, Victoria, Australia     | Principal Investigator                                  |                                                                                            |
| Kym                               | Gellie     |                       |                  | Box Hill (Eastern Health) | Eastern Melbourne, Victoria, Australia     | Research Coordinator                                    |                                                                                            |
| Stephanie                         | Hunter     |                       |                  | Box Hill (Eastern Health) | Eastern Melbourne, Victoria, Australia     | Research Coordinator                                    |                                                                                            |
| Melissa                           | Kaufman    |                       |                  | Box Hill (Eastern Health) | Eastern Melbourne, Victoria, Australia     | Research Coordinator                                    |                                                                                            |
| Owen                              | Roodenburg |                       |                  | Box Hill (Eastern Health) | Eastern Melbourne, Victoria, Australia     | Co-Investigator                                         |                                                                                            |
| Joseph                            | Veto       |                       |                  | Box Hill (Eastern Health) | Eastern Melbourne, Victoria, Australia     | Co-Investigator                                         |                                                                                            |
| Julia                             | Affleck    |                       |                  | Caboolture Hospital       | Moreton Bay, Queensland, Australia         | Research Coordinator                                    |                                                                                            |
| Mahesh                            | Ramanan    |                       |                  | Caboolture Hospital       | Moreton Bay, Queensland, Australia         | Principal Investigator                                  |                                                                                            |
| Megan                             | Ratcliffe  |                       |                  | Caboolture Hospital       | Moreton Bay, Queensland, Australia         | Research Coordinator                                    |                                                                                            |
| Alexis                            | Tabah      |                       |                  | Caboolture Hospital       | Moreton Bay, Queensland, Australia         | Co-Investigator                                         |                                                                                            |

## Supplemental Online Content: Nonauthor Collaborators

\*First name, last name, and suffix (if applicable) are required and will appear in PubMed.

| *First Name and Middle Initial(s) | *Last Name  | *Suffix (eg, Jr, III) | Academic Degrees | Institution                    | Location (city, state/province, country) | Role or Contribution, eg, chair, principal investigator | Group (if more than 1 Group listed in the byline) and/or Subgroup (eg, Steering Committee) |
|-----------------------------------|-------------|-----------------------|------------------|--------------------------------|------------------------------------------|---------------------------------------------------------|--------------------------------------------------------------------------------------------|
| Timothy                           | Warhurst    |                       |                  | Caboolture Hospital            | Moreton Bay, Queensland, Australia       | Co-Investigator                                         |                                                                                            |
| Maimoonbe                         | Gough       |                       |                  | Gold Coast University Hospital | Gold Coast, Queensland, Australia        | Research Coordinator                                    |                                                                                            |
| Maree                             | Houbert     |                       |                  | Gold Coast University Hospital | Gold Coast, Queensland, Australia        | Research Coordinator                                    |                                                                                            |
| Julie                             | Pitman      |                       |                  | Gold Coast University Hospital | Gold Coast, Queensland, Australia        | Research Coordinator                                    |                                                                                            |
| Mandy                             | Tallott     |                       |                  | Gold Coast University Hospital | Gold Coast, Queensland, Australia        | Research Coordinator                                    |                                                                                            |
| James                             | Winearls    |                       |                  | Gold Coast University Hospital | Gold Coast, Queensland, Australia        | Principal Investigator                                  |                                                                                            |
| Shelley                           | Donovan     |                       |                  | Gosford Hospital               | Gosford, New South Wales, Australia      | Research Coordinator                                    |                                                                                            |
| Katrina                           | Ellis       |                       |                  | Gosford Hospital               | Gosford, New South Wales, Australia      | Research Coordinator                                    |                                                                                            |
| Atul                              | Gaur        |                       |                  | Gosford Hospital               | Gosford, New South Wales, Australia      | Principal Investigator                                  |                                                                                            |
| Mary                              | Keehan      |                       |                  | Gosford Hospital               | Gosford, New South Wales, Australia      | Research Coordinator                                    |                                                                                            |
| Amy                               | Kelty       |                       |                  | Gosford Hospital               | Gosford, New South Wales, Australia      | Research Coordinator                                    |                                                                                            |
| Elisha                            | Turner      |                       |                  | Gosford Hospital               | Gosford, New South Wales, Australia      | Research Coordinator                                    |                                                                                            |
| Cynthia                           | Bierl       |                       |                  | John Hunter Hospital           | Newcastle, New South Wales, Australia    | Co-Investigator                                         |                                                                                            |
| Gail                              | Brinkerhoff |                       |                  | John Hunter Hospital           | Newcastle, New South Wales, Australia    | Research Coordinator                                    |                                                                                            |
| Dustin                            | Bush        |                       |                  | John Hunter Hospital           | Newcastle, New South Wales, Australia    | Research Coordinator                                    |                                                                                            |

## Supplemental Online Content: Nonauthor Collaborators

\*First name, last name, and suffix (if applicable) are required and will appear in PubMed.

| *First Name and Middle Initial(s) | *Last Name | *Suffix (eg, Jr, III) | Academic Degrees | Institution                 | Location (city, state/province, country) | Role or Contribution, eg, chair, principal investigator | Group (if more than 1 Group listed in the byline) and/or Subgroup (eg, Steering Committee) |
|-----------------------------------|------------|-----------------------|------------------|-----------------------------|------------------------------------------|---------------------------------------------------------|--------------------------------------------------------------------------------------------|
| Amber-Louise                      | Poulter    |                       |                  | John Hunter Hospital        | Newcastle, New South Wales, Australia    | Research Coordinator                                    |                                                                                            |
| Krishna                           | Sunkara    |                       |                  | John Hunter Hospital        | Newcastle, New South Wales, Australia    | Research Assistant                                      |                                                                                            |
| Melanie                           | Cooper     |                       |                  | Logan Hospital              | Logan, Queensland, Australia             | Research Coordinator                                    |                                                                                            |
| Lynette                           | Morrison   |                       |                  | Logan Hospital              | Logan, Queensland, Australia             | Research Coordinator                                    |                                                                                            |
| Sunil                             | Sane       |                       |                  | Logan Hospital              | Logan, Queensland, Australia             | Co-Investigator                                         |                                                                                            |
| Joanne                            | Sutton     |                       |                  | Logan Hospital              | Logan, Queensland, Australia             | Research Coordinator                                    |                                                                                            |
| Hayden                            | White      |                       |                  | Logan Hospital              | Logan, Queensland, Australia             | Principal Investigator                                  |                                                                                            |
| Vishwanath                        | Biradar    |                       |                  | Lyell McEwin Hospital       | Adelaide, South Australia, Australia     | Principal Investigator                                  |                                                                                            |
| Milind                            | Sanap      |                       |                  | Lyell McEwin Hospital       | Adelaide, South Australia, Australia     | Principal Investigator                                  |                                                                                            |
| Natalie                           | Soar       |                       |                  | Lyell McEwin Hospital       | Adelaide, South Australia, Australia     | Research Coordinator                                    |                                                                                            |
| Megan                             | Davis      |                       |                  | Princess Alexandra Hospital | Brisbane, Queensland, Australia          | Research Coordinator                                    |                                                                                            |
| Meg                               | Harward    |                       |                  | Princess Alexandra Hospital | Brisbane, Queensland, Australia          | Research Coordinator                                    |                                                                                            |
| Cassie                            | Jones      |                       |                  | Princess Alexandra Hospital | Brisbane, Queensland, Australia          | Research Coordinator                                    |                                                                                            |
| Josie                             | Mackay     |                       |                  | Princess Alexandra Hospital | Brisbane, Queensland, Australia          | Research Coordinator                                    |                                                                                            |
| Niki                              | McGuinness |                       |                  | Princess Alexandra Hospital | Brisbane, Queensland, Australia          | Research Coordinator                                    |                                                                                            |

## Supplemental Online Content: Nonauthor Collaborators

\*First name, last name, and suffix (if applicable) are required and will appear in PubMed.

| *First Name and Middle Initial(s) | *Last Name | *Suffix (eg, Jr, III) | Academic Degrees | Institution                  | Location (city, state/province, country) | Role or Contribution, eg, chair, principal investigator | Group (if more than 1 Group listed in the byline) and/or Subgroup (eg, Steering Committee) |
|-----------------------------------|------------|-----------------------|------------------|------------------------------|------------------------------------------|---------------------------------------------------------|--------------------------------------------------------------------------------------------|
| Jason                             | Meye       |                       |                  | Princess Alexandra Hospital  | Brisbane, Queensland, Australia          | Research Coordinator                                    |                                                                                            |
| Emma                              | Saylor     |                       |                  | Princess Alexandra Hospital  | Brisbane, Queensland, Australia          | Research Coordinator                                    |                                                                                            |
| Adam                              | Suliman    |                       |                  | Princess Alexandra Hospital  | Brisbane, Queensland, Australia          | Co-Investigator                                         |                                                                                            |
| Alex                              | Tabah      |                       |                  | Princess Alexandra Hospital  | Brisbane, Queensland, Australia          | Co-Investigator                                         |                                                                                            |
| Ellen                             | Venz       |                       |                  | Princess Alexandra Hospital  | Brisbane, Queensland, Australia          | Research Coordinator                                    |                                                                                            |
| James                             | Walsham    |                       |                  | Princess Alexandra Hospital  | Brisbane, Queensland, Australia          | Principal Investigator                                  |                                                                                            |
| Krista                            | Wetzig     |                       |                  | Princess Alexandra Hospital  | Brisbane, Queensland, Australia          | Research Coordinator                                    |                                                                                            |
| Catherine                         | Kurenda    |                       |                  | The Queen Elizabeth Hospital | Adelaide, South Australia, Australia     | Research Coordinator                                    |                                                                                            |
| Patricia                          | Williams   |                       |                  | The Queen Elizabeth Hospital | Adelaide, South Australia, Australia     | Research Coordinator                                    |                                                                                            |
| Stuart                            | Baker      |                       |                  | Redcliffe Hospital           | Moreton Bay, Queensland, Australia       | Co-Investigator                                         |                                                                                            |
| Maree                             | Duroux     |                       |                  | Redcliffe Hospital           | Moreton Bay, Queensland, Australia       | Research Coordinator                                    |                                                                                            |
| Kylie                             | Jacobs     |                       |                  | Redcliffe Hospital           | Moreton Bay, Queensland, Australia       | Research Coordinator                                    |                                                                                            |
| Hamish                            | Pollock    |                       |                  | Redcliffe Hospital           | Moreton Bay, Queensland, Australia       | Co-Investigator                                         |                                                                                            |
| Megan                             | Ratcliffe  |                       |                  | Redcliffe Hospital           | Moreton Bay, Queensland, Australia       | Research Coordinator                                    |                                                                                            |
| Sam                               | Shone      |                       |                  | Redcliffe Hospital           | Moreton Bay, Queensland, Australia       | Research Coordinator                                    |                                                                                            |

## Supplemental Online Content: Nonauthor Collaborators

\*First name, last name, and suffix (if applicable) are required and will appear in PubMed.

| *First Name and Middle Initial(s) | *Last Name   | *Suffix (eg, Jr, III) | Academic Degrees | Institution                         | Location (city, state/province, country) | Role or Contribution, eg, chair, principal investigator | Group (if more than 1 Group listed in the byline) and/or Subgroup (eg, Steering Committee) |
|-----------------------------------|--------------|-----------------------|------------------|-------------------------------------|------------------------------------------|---------------------------------------------------------|--------------------------------------------------------------------------------------------|
| Alexis                            | Tabah        |                       |                  | Redcliffe Hospital                  | Moreton Bay, Queensland, Australia       | Co-Investigator                                         |                                                                                            |
| Timothy                           | Warhurst     |                       |                  | Redcliffe Hospital                  | Moreton Bay, Queensland, Australia       | Principal Investigator                                  |                                                                                            |
| Jenie                             | Butler       |                       |                  | Royal Brisbane and Women's Hospital | Brisbane, Queensland, Australia          | Research Coordinator                                    |                                                                                            |
| Cheryl                            | Fourie       |                       |                  | Royal Brisbane and Women's Hospital | Brisbane, Queensland, Australia          | Research Coordinator                                    |                                                                                            |
| Marianne                          | Kirrane      |                       |                  | Royal Brisbane and Women's Hospital | Brisbane, Queensland, Australia          | Principal Investigator                                  |                                                                                            |
| Melissa                           | Lassig-Smith |                       |                  | Royal Brisbane and Women's Hospital | Brisbane, Queensland, Australia          | Research Coordinator                                    |                                                                                            |
| Daisy                             | Lindsay      |                       |                  | Royal Brisbane and Women's Hospital | Brisbane, Queensland, Australia          | Research Coordinator                                    |                                                                                            |
| Amelia                            | Livermore    |                       |                  | Royal Brisbane and Women's Hospital | Brisbane, Queensland, Australia          | Research Coordinator                                    |                                                                                            |
| Bree-Yana                         | McConnochie  |                       |                  | Royal Brisbane and Women's Hospital | Brisbane, Queensland, Australia          | Research Coordinator                                    |                                                                                            |
| Lynn                              | Murray       |                       |                  | Royal Brisbane and Women's Hospital | Brisbane, Queensland, Australia          | Research Coordinator                                    |                                                                                            |
| Georgina                          | Peacock      |                       |                  | Royal Brisbane and Women's Hospital | Brisbane, Queensland, Australia          | Research Coordinator                                    |                                                                                            |
| Janine                            | Stuart       |                       |                  | Royal Brisbane and Women's Hospital | Brisbane, Queensland, Australia          | Research Coordinator                                    |                                                                                            |
| Sidharth                          | Agarwal      |                       |                  | Royal Darwin Hospital               | Darwin, Northern Territory, Australia    | Principal Investigator                                  |                                                                                            |
| Margaret                          | Phillips     |                       |                  | Royal Darwin Hospital               | Darwin, Northern Territory, Australia    | Research Coordinator                                    |                                                                                            |
| Kirsty                            | Smyth        |                       |                  | Royal Darwin Hospital               | Darwin, Northern Territory, Australia    | Research Coordinator                                    |                                                                                            |

## Supplemental Online Content: Nonauthor Collaborators

\*First name, last name, and suffix (if applicable) are required and will appear in PubMed.

| *First Name and Middle Initial(s) | *Last Name     | *Suffix (eg, Jr, III) | Academic Degrees | Institution                | Location (city, state/province, country)    | Role or Contribution, eg, chair, principal investigator | Group (if more than 1 Group listed in the byline) and/or Subgroup (eg, Steering Committee) |
|-----------------------------------|----------------|-----------------------|------------------|----------------------------|---------------------------------------------|---------------------------------------------------------|--------------------------------------------------------------------------------------------|
| David                             | Cooper         |                       |                  | Royal Hobart Hospital      | Hobart, Tasmania, Australia                 | Principal Investigator                                  |                                                                                            |
| Rick                              | McAllister     |                       |                  | Royal Hobart Hospital      | Hobart, Tasmania, Australia                 | Research Coordinator                                    |                                                                                            |
| Yasmine                           | Ali Abdelhamid |                       |                  | Royal Melbourne Hospital   | Melbourne, Victoria, Australia              | Co-Investigator                                         |                                                                                            |
| Deborah                           | Barge          |                       |                  | Royal Melbourne Hospital   | Melbourne, Victoria, Australia              | Research Coordinator                                    |                                                                                            |
| Kathleen                          | Byrne          |                       |                  | Royal Melbourne Hospital   | Melbourne, Victoria, Australia              | Research Coordinator                                    |                                                                                            |
| Adam                              | Deane          |                       |                  | Royal Melbourne Hospital   | Melbourne, Victoria, Australia              | Principal Investigator                                  |                                                                                            |
| Sarah                             | Doherty        |                       |                  | Royal Melbourne Hospital   | Melbourne, Victoria, Australia              | Research Coordinator                                    |                                                                                            |
| Simon                             | Iles           |                       |                  | Royal Melbourne Hospital   | Melbourne, Victoria, Australia              | Co-Investigator                                         |                                                                                            |
| Brie                              | Jelbart        |                       |                  | Royal Melbourne Hospital   | Melbourne, Victoria, Australia              | Research Coordinator                                    |                                                                                            |
| Thomas                            | Rechnitzer     |                       |                  | Royal Melbourne Hospital   | Melbourne, Victoria, Australia              | Co-Investigator                                         |                                                                                            |
| Angela                            | Ashelford      |                       |                  | Royal North Shore Hospital | Northern Sydney, New South Wales, Australia | Research Coordinator                                    |                                                                                            |
| Frances                           | Bass           |                       |                  | Royal North Shore Hospital | Northern Sydney, New South Wales, Australia | Research Manager                                        |                                                                                            |
| Celia                             | Bradford       |                       |                  | Royal North Shore Hospital | Northern Sydney, New South Wales, Australia | Co-Investigator                                         |                                                                                            |
| Anthony                           | Delaney        |                       |                  | Royal North Shore Hospital | Northern Sydney, New South Wales, Australia | Co-Investigator                                         |                                                                                            |
| Jonathan                          | Gatward        |                       |                  | Royal North Shore Hospital | Northern Sydney, New South Wales, Australia | Co-Investigator                                         |                                                                                            |

## Supplemental Online Content: Nonauthor Collaborators

\*First name, last name, and suffix (if applicable) are required and will appear in PubMed.

| *First Name and Middle Initial(s) | *Last Name | *Suffix (eg, Jr, III) | Academic Degrees | Institution                  | Location (city, state/province, country)    | Role or Contribution, eg, chair, principal investigator | Group (if more than 1 Group listed in the byline) and/or Subgroup (eg, Steering Committee) |
|-----------------------------------|------------|-----------------------|------------------|------------------------------|---------------------------------------------|---------------------------------------------------------|--------------------------------------------------------------------------------------------|
| Roger                             | Harris     |                       |                  | Royal North Shore Hospital   | Northern Sydney, New South Wales, Australia | Co-Investigator                                         |                                                                                            |
| Pierre                            | Janin      |                       |                  | Royal North Shore Hospital   | Northern Sydney, New South Wales, Australia | Principal Investigator                                  |                                                                                            |
| Richard                           | Lee        |                       |                  | Royal North Shore Hospital   | Northern Sydney, New South Wales, Australia | Co-Investigator                                         |                                                                                            |
| Elizabeth                         | Limbrey    |                       |                  | Royal North Shore Hospital   | Northern Sydney, New South Wales, Australia | Research Assistant                                      |                                                                                            |
| Sharon                            | Mar        |                       |                  | Royal North Shore Hospital   | Northern Sydney, New South Wales, Australia | Research Coordinator                                    |                                                                                            |
| Naomi                             | Pallas     |                       |                  | Royal North Shore Hospital   | Northern Sydney, New South Wales, Australia | Co-Investigator                                         |                                                                                            |
| Julia                             | Pilowsky   |                       |                  | Royal North Shore Hospital   | Northern Sydney, New South Wales, Australia | Research Coordinator                                    |                                                                                            |
| Melanie                           | Ross       |                       |                  | Royal North Shore Hospital   | Northern Sydney, New South Wales, Australia | Research Assistant                                      |                                                                                            |
| Wade                              | Stedman    |                       |                  | Royal North Shore Hospital   | Northern Sydney, New South Wales, Australia | Co-Investigator                                         |                                                                                            |
| Miyuki                            | Tokumitsu  |                       |                  | Royal North Shore Hospital   | Northern Sydney, New South Wales, Australia | Research Coordinator                                    |                                                                                            |
| Elizabeth                         | Yarad      |                       |                  | Royal North Shore Hospital   | Northern Sydney, New South Wales, Australia | Research Coordinator                                    |                                                                                            |
| Maryam                            | Alborzi    |                       |                  | Royal Prince Alfred Hospital | Sydney, New South Wales, Australia          | Research Coordinator                                    |                                                                                            |
| Heidi                             | Buhr       |                       |                  | Royal Prince Alfred Hospital | Sydney, New South Wales, Australia          | Research Coordinator                                    |                                                                                            |
| Jennifer                          | Coles      |                       |                  | Royal Prince Alfred Hospital | Sydney, New South Wales, Australia          | Research Coordinator                                    |                                                                                            |
| David                             | Gattas     |                       |                  | Royal Prince Alfred Hospital | Sydney, New South Wales, Australia          | Principal Investigator                                  |                                                                                            |



## Supplemental Online Content: Nonauthor Collaborators

\*First name, last name, and suffix (if applicable) are required and will appear in PubMed.

| *First Name and Middle Initial(s) | *Last Name | *Suffix (eg, Jr, III) | Academic Degrees | Institution                 | Location (city, state/province, country)         | Role or Contribution, eg, chair, principal investigator | Group (if more than 1 Group listed in the byline) and/or Subgroup (eg, Steering Committee) |
|-----------------------------------|------------|-----------------------|------------------|-----------------------------|--------------------------------------------------|---------------------------------------------------------|--------------------------------------------------------------------------------------------|
| Andrew                            | Cheng      |                       |                  | St George Hospital          | South Eastern Sydney, New South Wales, Australia | Principal Investigator                                  |                                                                                            |
| Deborah                           | Inskip     |                       |                  | St George Hospital          | South Eastern Sydney, New South Wales, Australia | Research Coordinator                                    |                                                                                            |
| Asako                             | Ito        |                       |                  | St George Hospital          | South Eastern Sydney, New South Wales, Australia | Principal Investigator                                  |                                                                                            |
| Jennene                           | Miller     |                       |                  | St George Hospital          | South Eastern Sydney, New South Wales, Australia | Research Coordinator                                    |                                                                                            |
| Claire                            | Reynolds   |                       |                  | St Vincent's Hospital       | Sydney, New South Wales, Australia               | Research Coordinator                                    |                                                                                            |
| Sam                               | Rudham     |                       |                  | St Vincent's Hospital       | Sydney, New South Wales, Australia               | Principal Investigator                                  |                                                                                            |
| Alison                            | Bone       |                       |                  | University Hospital Geelong | Geelong, Victoria, Australia                     | Research Coordinator                                    |                                                                                            |
| Claire                            | Cattigan   |                       |                  | University Hospital Geelong | Geelong, Victoria, Australia                     | Principal Investigator                                  |                                                                                            |
| Tania                             | Elderkin   |                       |                  | University Hospital Geelong | Geelong, Victoria, Australia                     | Research Coordinator                                    | (Deceased)                                                                                 |
| Tania                             | Salerno    |                       |                  | University Hospital Geelong | Geelong, Victoria, Australia                     | Research Coordinator                                    |                                                                                            |
| Jeremy                            | Cohen      |                       |                  | The Wesley Hospital         | Brisbane, Queensland, Australia                  | Co-Investigator                                         |                                                                                            |
| Amanda                            | Davie      |                       |                  | The Wesley Hospital         | Brisbane, Queensland, Australia                  | Research Coordinator                                    |                                                                                            |
| Amy                               | Owens      |                       |                  | The Wesley Hospital         | Brisbane, Queensland, Australia                  | Research Coordinator                                    |                                                                                            |

## Supplemental Online Content: Nonauthor Collaborators

\*First name, last name, and suffix (if applicable) are required and will appear in PubMed.

| *First Name and Middle Initial(s) | *Last Name   | *Suffix (eg, Jr, III) | Academic Degrees | Institution                  | Location (city, state/province, country)   | Role or Contribution, eg, chair, principal investigator | Group (if more than 1 Group listed in the byline) and/or Subgroup (eg, Steering Committee) |
|-----------------------------------|--------------|-----------------------|------------------|------------------------------|--------------------------------------------|---------------------------------------------------------|--------------------------------------------------------------------------------------------|
| Roslyn                            | Purcell      |                       |                  | The Wesley Hospital          | Brisbane, Queensland, Australia            | Co-Investigator                                         |                                                                                            |
| Balasubramanian                   | Venkatesh    |                       |                  | The Wesley Hospital          | Brisbane, Queensland, Australia            | Principal Investigator                                  |                                                                                            |
| David                             | Bowen        |                       |                  | Westmead Hospital            | Western Sydney, New South Wales, Australia | Co-Investigator                                         |                                                                                            |
| Peter                             | Clark        |                       |                  | Westmead Hospital            | Western Sydney, New South Wales, Australia | Co-Investigator                                         |                                                                                            |
| Mohammad                          | Hamidi       |                       |                  | Westmead Hospital            | Western Sydney, New South Wales, Australia | Co-Investigator                                         |                                                                                            |
| Jenyfer                           | Joy          |                       |                  | Westmead Hospital            | Western Sydney, New South Wales, Australia | Research Coordinator                                    |                                                                                            |
| Jing                              | Kong         |                       |                  | Westmead Hospital            | Western Sydney, New South Wales, Australia | Research Coordinator                                    |                                                                                            |
| Vineet                            | Nayyar       |                       |                  | Westmead Hospital            | Western Sydney, New South Wales, Australia | Principal Investigator                                  |                                                                                            |
| Kaatje                            | Cruysberghs  |                       |                  | Antwerp University Hospital  | Antwerp, Belgium                           | Research Coordinator                                    |                                                                                            |
| Philippe                          | Jorens       |                       |                  | Antwerp University Hospital  | Antwerp, Belgium                           | Principal Investigator                                  |                                                                                            |
| Petra                             | Vertongen    |                       |                  | Antwerp University Hospital  | Antwerp, Belgium                           | Research Coordinator                                    |                                                                                            |
| Marc                              | Diltoer      |                       |                  | Brussels University Hospital | Brussels, Belgium                          | Principal Investigator                                  |                                                                                            |
| Marie Claire                      | Van Malderen |                       |                  | Brussels University Hospital | Brussels, Belgium                          | Research Coordinator                                    |                                                                                            |
| Anne                              | Joosten      |                       |                  | Civil Hospital Marie Curie   | Brussels, Belgium                          | Research Coordinator                                    |                                                                                            |
| Maxime                            | Van Cutsem   |                       |                  | Civil Hospital Marie Curie   | Brussels, Belgium                          | Principal Investigator                                  |                                                                                            |
| Caroline                          | Abbenhuijs   |                       |                  | Erasmus Hospital             | Brussels, Belgium                          | Research Coordinator                                    |                                                                                            |
| Dominique                         | Durand       |                       |                  | Erasmus Hospital             | Brussels, Belgium                          | Research Coordinator                                    |                                                                                            |

## Supplemental Online Content: Nonauthor Collaborators

\*First name, last name, and suffix (if applicable) are required and will appear in PubMed.

| *First Name and Middle Initial(s) | *Last Name      | *Suffix (eg, Jr, III) | Academic Degrees | Institution                   | Location (city, state/province, country) | Role or Contribution, eg, chair, principal investigator | Group (if more than 1 Group listed in the byline) and/or Subgroup (eg, Steering Committee) |
|-----------------------------------|-----------------|-----------------------|------------------|-------------------------------|------------------------------------------|---------------------------------------------------------|--------------------------------------------------------------------------------------------|
| Nancy                             | Matumikina      |                       |                  | Erasmus Hospital              | Brussels, Belgium                        | Research Coordinator                                    |                                                                                            |
| Fabio                             | Taccone         |                       |                  | Erasmus Hospital              | Brussels, Belgium                        | Principal Investigator                                  |                                                                                            |
| Stephanie                         | Bracke          |                       |                  | Ghent University Hospital     | Ghent, Belgium                           | Research Coordinator                                    |                                                                                            |
| Lesley                            | De Coster       |                       |                  | Ghent University Hospital     | Ghent, Belgium                           | Research Coordinator                                    |                                                                                            |
| Luc                               | De Crop         |                       |                  | Ghent University Hospital     | Ghent, Belgium                           | Research Coordinator                                    |                                                                                            |
| Anouska                           | De Smeypere     |                       |                  | Ghent University Hospital     | Ghent, Belgium                           | Research Coordinator                                    |                                                                                            |
| Jolien                            | Van Hecke       |                       |                  | Ghent University Hospital     | Ghent, Belgium                           | Research Coordinator                                    |                                                                                            |
| Daisy                             | Vermeiren       |                       |                  | Ghent University Hospital     | Ghent, Belgium                           | Research Coordinator                                    |                                                                                            |
| Jan                               | Heerman         |                       |                  | Maria Middelaes Hospital      | Ghent, Belgium                           | Principal Investigator                                  |                                                                                            |
| Steffi                            | Ryckaert        |                       |                  | Maria Middelaes Hospital      | Ghent, Belgium                           | Research Coordinator                                    |                                                                                            |
| Annelies                          | Van Damme       |                       |                  | Maria Middelaes Hospital      | Ghent, Belgium                           | Research Coordinator                                    |                                                                                            |
| Nicolas                           | De Schryver     |                       |                  | Saint Pierre Ottignies Clinic | Ottignies-Louvain-la-Neuve, Belgium      | Principal Investigator                                  |                                                                                            |
| Anne                              | Thirifays       |                       |                  | Saint Pierre Ottignies Clinic | Ottignies-Louvain-la-Neuve, Belgium      | Research Coordinator                                    |                                                                                            |
| Els                               | Fannes          |                       |                  | Stuivenberg Hospital          | Antwerp, Belgium                         | Research Coordinator                                    |                                                                                            |
| Niels                             | Van Regenmortel |                       |                  | Stuivenberg Hospital          | Antwerp, Belgium                         | Principal Investigator                                  |                                                                                            |
| Corentine                         | Alauzet         |                       |                  | Brabois Hospital Nancy        | Vandoeuvre-Les-Nancy, France             | Co-Investigator                                         |                                                                                            |

## Supplemental Online Content: Nonauthor Collaborators

\*First name, last name, and suffix (if applicable) are required and will appear in PubMed.

| *First Name and Middle Initial(s) | *Last Name      | *Suffix (eg, Jr, III) | Academic Degrees | Institution                   | Location (city, state/province, country) | Role or Contribution, eg, chair, principal investigator | Group (if more than 1 Group listed in the byline) and/or Subgroup (eg, Steering Committee) |
|-----------------------------------|-----------------|-----------------------|------------------|-------------------------------|------------------------------------------|---------------------------------------------------------|--------------------------------------------------------------------------------------------|
| Thibaut                           | Belveyre        |                       |                  | Brabois Hospital Nancy        | Vandoeuvre-Les-Nancy, France             | Co-Investigator                                         |                                                                                            |
| Jessica                           | Breistroff      |                       |                  | Brabois Hospital Nancy        | Vandoeuvre-Les-Nancy, France             | Research Coordinator                                    |                                                                                            |
| Aurélie                           | Gutehrle        |                       |                  | Brabois Hospital Nancy        | Vandoeuvre-Les-Nancy, France             | Research Coordinator                                    |                                                                                            |
| Emmanuel                          | Novy            |                       |                  | Brabois Hospital Nancy        | Vandoeuvre-Les-Nancy, France             | Principal investigator                                  |                                                                                            |
| Maximilien                        | Saint Gilles    |                       |                  | Brabois Hospital Nancy        | Vandoeuvre-Les-Nancy, France             | Research Coordinator                                    |                                                                                            |
| Marie                             | Bonnefoy        |                       |                  | Henri Duffaut Hospital Centre | Avignon, France                          | Research Coordinator                                    |                                                                                            |
| Audrey                            | Clavier         |                       |                  | Henri Duffaut Hospital Centre | Avignon, France                          | Research Coordinator                                    |                                                                                            |
| Pierre                            | Ducq            |                       |                  | Henri Duffaut Hospital Centre | Avignon, France                          | Co-Investigator                                         |                                                                                            |
| Antoine                           | Frouin          |                       |                  | Henri Duffaut Hospital Centre | Avignon, France                          | Principal investigator                                  |                                                                                            |
| Sébastien                         | Moschietto      |                       |                  | Henri Duffaut Hospital Centre | Avignon, France                          | Co-Investigator                                         |                                                                                            |
| Marion                            | Touzet          |                       |                  | Henri Duffaut Hospital Centre | Avignon, France                          | Research Coordinator                                    |                                                                                            |
| Claire                            | Dahyot-Fizelier |                       |                  | Poitiers University Hospital  | Poitiers, France                         | Principal investigator                                  |                                                                                            |
| Angéline                          | Jamet           |                       |                  | Poitiers University Hospital  | Poitiers, France                         | Research Coordinator                                    |                                                                                            |
| Angela                            | Kostencovska    |                       |                  | Poitiers University Hospital  | Poitiers, France                         | Research Coordinator                                    |                                                                                            |
| Quentin                           | Saint Genis     |                       |                  | Poitiers University Hospital  | Poitiers, France                         | Research Coordinator                                    |                                                                                            |
| Sami                              | Alaya           |                       |                  | Salon de Provence Hospital    | Salon de Provence, France                | Principal investigator                                  |                                                                                            |
| Ali                               | Mofredj         |                       |                  | Salon de Provence Hospital    | Salon de Provence, France                | Co-Investigator                                         |                                                                                            |
| Caroline                          | Boutin          |                       |                  | University Hospital of Nîmes  | Nîmes, France                            | Co-Investigator                                         |                                                                                            |

## Supplemental Online Content: Nonauthor Collaborators

\*First name, last name, and suffix (if applicable) are required and will appear in PubMed.

| *First Name and Middle Initial(s) | *Last Name      | *Suffix (eg, Jr, III) | Academic Degrees | Institution                        | Location (city, state/province, country) | Role or Contribution, eg, chair, principal investigator | Group (if more than 1 Group listed in the byline) and/or Subgroup (eg, Steering Committee) |
|-----------------------------------|-----------------|-----------------------|------------------|------------------------------------|------------------------------------------|---------------------------------------------------------|--------------------------------------------------------------------------------------------|
| Loubna                            | Elotmani        |                       |                  | University Hospital of Nîmes       | Nîmes, France                            | Research Coordinator                                    |                                                                                            |
| Martin                            | Mahul           |                       |                  | University Hospital of Nîmes       | Nîmes, France                            | Co-Investigator                                         |                                                                                            |
| Laurent                           | Muller          |                       |                  | University Hospital of Nîmes       | Nîmes, France                            | Co-Investigator                                         |                                                                                            |
| Nicolas                           | Perin           |                       |                  | University Hospital of Nîmes       | Nîmes, France                            | Co-Investigator                                         |                                                                                            |
| Sanihah                           | Che Omar        |                       |                  | Hospital University Sains Malaysia | Kota Bharu, Kelantan, Malaysia           | Co-investigator                                         |                                                                                            |
| Suki                              | Ismet           |                       |                  | Hospital University Sains Malaysia | Kota Bharu, Kelantan, Malaysia           | Co-investigator                                         |                                                                                            |
| Noor Iellieya Maisarah            | Jamaludin       |                       |                  | Hospital University Sains Malaysia | Kota Bharu, Kelantan, Malaysia           | Research Assistant                                      |                                                                                            |
| Md Fadhil                         | Mat Amin        |                       |                  | Hospital University Sains Malaysia | Kota Bharu, Kelantan, Malaysia           | Research Coordinator                                    |                                                                                            |
| Mohd Zulfakar                     | Mazlan          |                       |                  | Hospital University Sains Malaysia | Kota Bharu, Kelantan, Malaysia           | Principal investigator                                  |                                                                                            |
| Husna                             | Mohd Nor        |                       |                  | Hospital University Sains Malaysia | Kota Bharu, Kelantan, Malaysia           | Research Assistant                                      |                                                                                            |
| Nabila                            | Mohd Sukri      |                       |                  | Hospital University Sains Malaysia | Kota Bharu, Kelantan, Malaysia           | Research Assistant                                      |                                                                                            |
| Nurul Amira                       | Nizar           |                       |                  | Hospital University Sains Malaysia | Kota Bharu, Kelantan, Malaysia           | Research Assistant                                      |                                                                                            |
| Mahamarowi                        | Omar            |                       |                  | Hospital University Sains Malaysia | Kota Bharu, Kelantan, Malaysia           | Co-investigator                                         |                                                                                            |
| Era Nabilah                       | Roslan          |                       |                  | Hospital University Sains Malaysia | Kota Bharu, Kelantan, Malaysia           | Research Assistant                                      |                                                                                            |
| Zeti Norfidiyati                  | Salmuna         |                       |                  | Hospital University Sains Malaysia | Kota Bharu, Kelantan, Malaysia           | Co-Investigator                                         |                                                                                            |
| Tuan Zulfadli Syazwan             | Tuan Mohd Adnan |                       |                  | Hospital University Sains Malaysia | Kota Bharu, Kelantan, Malaysia           | Research Assistant                                      |                                                                                            |
| W Mohd Nazarudin                  | W Hassan        |                       |                  | Hospital University Sains Malaysia | Kota Bharu, Kelantan, Malaysia           | Co-investigator                                         |                                                                                            |

## Supplemental Online Content: Nonauthor Collaborators

\*First name, last name, and suffix (if applicable) are required and will appear in PubMed.

| *First Name and Middle Initial(s) | *Last Name               | *Suffix (eg, Jr, III) | Academic Degrees | Institution                        | Location (city, state/province, country) | Role or Contribution, eg, chair, principal investigator | Group (if more than 1 Group listed in the byline) and/or Subgroup (eg, Steering Committee) |
|-----------------------------------|--------------------------|-----------------------|------------------|------------------------------------|------------------------------------------|---------------------------------------------------------|--------------------------------------------------------------------------------------------|
| Halimatun Arwa                    | Yaakub                   |                       |                  | Hospital University Sains Malaysia | Kota Bharu, Kelantan, Malaysia           | Research Assistant                                      |                                                                                            |
| Mohd Shahnaz                      | Hasan                    |                       |                  | University Malaya Medical Centre   | Kuala Lumpur, Malaysia                   | Principal investigator                                  |                                                                                            |
| Marhainie                         | Mohamad                  |                       |                  | University Malaya Medical Centre   | Kuala Lumpur, Malaysia                   | Research coordinator                                    |                                                                                            |
| Mohamad Irfan                     | Othman Jailani           |                       |                  | University Malaya Medical Centre   | Kuala Lumpur, Malaysia                   | Research coordinator                                    |                                                                                            |
| Helmi                             | Sulaiman                 |                       |                  | University Malaya Medical Centre   | Kuala Lumpur, Malaysia                   | Co-Investigator                                         |                                                                                            |
| Farisha                           | Ali                      |                       |                  | Auckland City Hospital (CVICU)     | Auckland, New Zealand                    | Research Coordinator                                    |                                                                                            |
| Magdalena                         | Butler                   |                       |                  | Auckland City Hospital (CVICU)     | Auckland, New Zealand                    | Research Coordinator                                    |                                                                                            |
| Keri-Anne                         | Cowdrey                  |                       |                  | Auckland City Hospital (CVICU)     | Auckland, New Zealand                    | Research Coordinator                                    |                                                                                            |
| Eileen                            | Gilder                   |                       |                  | Auckland City Hospital (CVICU)     | Auckland, New Zealand                    | Research Coordinator                                    |                                                                                            |
| Jane                              | Hallion                  |                       |                  | Auckland City Hospital (CVICU)     | Auckland, New Zealand                    | Research Coordinator                                    |                                                                                            |
| Immanuel                          | Hennessy                 |                       |                  | Auckland City Hospital (CVICU)     | Auckland, New Zealand                    | Co-Investigator                                         |                                                                                            |
| Philippa                          | Neal                     |                       |                  | Auckland City Hospital (CVICU)     | Auckland, New Zealand                    | Research Coordinator                                    |                                                                                            |
| Karina                            | O'Connor                 |                       |                  | Auckland City Hospital (CVICU)     | Auckland, New Zealand                    | Research Coordinator                                    |                                                                                            |
| Rachael                           | Parke                    |                       |                  | Auckland City Hospital (CVICU)     | Auckland, New Zealand                    | Co-Investigator                                         |                                                                                            |
| Samantha                          | Ryan                     |                       |                  | Auckland City Hospital (CVICU)     | Auckland, New Zealand                    | Principal Investigator                                  |                                                                                            |
| Melissa                           | Woollett (now Robertson) |                       |                  | Auckland City Hospital (CVICU)     | Auckland, New Zealand                    | Research Coordinator                                    |                                                                                            |
| Yan                               | Chen                     |                       |                  | Auckland City Hospital (DCCM)      | Auckland, New Zealand                    | Research Coordinator                                    |                                                                                            |
| Colin                             | McArthur                 |                       |                  | Auckland City Hospital (DCCM)      | Auckland, New Zealand                    | Principal Investigator                                  |                                                                                            |

## Supplemental Online Content: Nonauthor Collaborators

\*First name, last name, and suffix (if applicable) are required and will appear in PubMed.

| *First Name and Middle Initial(s) | *Last Name     | *Suffix (eg, Jr, III) | Academic Degrees | Institution                   | Location (city, state/province, country) | Role or Contribution, eg, chair, principal investigator | Group (if more than 1 Group listed in the byline) and/or Subgroup (eg, Steering Committee) |
|-----------------------------------|----------------|-----------------------|------------------|-------------------------------|------------------------------------------|---------------------------------------------------------|--------------------------------------------------------------------------------------------|
| Rachael                           | McConnochie    |                       |                  | Auckland City Hospital (DCCM) | Auckland, New Zealand                    | Research Coordinator                                    |                                                                                            |
| Caroline                          | O'Connor       |                       |                  | Auckland City Hospital (DCCM) | Auckland, New Zealand                    | Research Coordinator                                    |                                                                                            |
| Catherine                         | Simmonds       |                       |                  | Auckland City Hospital (DCCM) | Auckland, New Zealand                    | Principal Investigator                                  |                                                                                            |
| Brandon                           | Burke          |                       |                  | Christchurch Hospital         | Christchurch, New Zealand                | Principal Investigator                                  |                                                                                            |
| Tara                              | Doyle          |                       |                  | Christchurch Hospital         | Christchurch, New Zealand                | Research Coordinator                                    |                                                                                            |
| Jan                               | Mehrtens       |                       |                  | Christchurch Hospital         | Christchurch, New Zealand                | Research Coordinator                                    |                                                                                            |
| Stacey                            | Morgan         |                       |                  | Christchurch Hospital         | Christchurch, New Zealand                | Research Coordinator                                    |                                                                                            |
| Anna                              | Morris         |                       |                  | Christchurch Hospital         | Christchurch, New Zealand                | Research Coordinator                                    |                                                                                            |
| Kym                               | Van Der Heyden |                       |                  | Christchurch Hospital         | Christchurch, New Zealand                | Research Coordinator                                    |                                                                                            |
| Dinu                              | Girijadevi     |                       |                  | Middlemore Hospital           | Auckland, New Zealand                    | Research Coordinator                                    |                                                                                            |
| Vivian                            | Lai            |                       |                  | Middlemore Hospital           | Auckland, New Zealand                    | Research Coordinator                                    |                                                                                            |
| Rima                              | Song           |                       |                  | Middlemore Hospital           | Auckland, New Zealand                    | Research Coordinator                                    |                                                                                            |
| Tony                              | Williams       |                       |                  | Middlemore Hospital           | Auckland, New Zealand                    | Principal Investigator                                  |                                                                                            |
| Amelia                            | Butler         |                       |                  | Waikato Hospital              | Hamilton, New Zealand                    | Research Coordinator                                    |                                                                                            |
| Caitriona                         | Fiske          |                       |                  | Waikato Hospital              | Hamilton, New Zealand                    | Research Coordinator                                    |                                                                                            |
| Annette                           | Forrest        |                       |                  | Waikato Hospital              | Hamilton, New Zealand                    | Principal Investigator                                  |                                                                                            |
| Erin                              | Furborough     |                       |                  | Waikato Hospital              | Hamilton, New Zealand                    | Research Coordinator                                    |                                                                                            |

## Supplemental Online Content: Nonauthor Collaborators

\*First name, last name, and suffix (if applicable) are required and will appear in PubMed.

| *First Name and Middle Initial(s) | *Last Name | *Suffix (eg, Jr, III) | Academic Degrees | Institution         | Location (city, state/province, country) | Role or Contribution, eg, chair, principal investigator | Group (if more than 1 Group listed in the byline) and/or Subgroup (eg, Steering Committee) |
|-----------------------------------|------------|-----------------------|------------------|---------------------|------------------------------------------|---------------------------------------------------------|--------------------------------------------------------------------------------------------|
| Robert                            | Martynoga  |                       |                  | Waikato Hospital    | Hamilton, New Zealand                    | Principal Investigator                                  |                                                                                            |
| Renesh                            | Nair       |                       |                  | Waikato Hospital    | Hamilton, New Zealand                    | Principal Investigator                                  |                                                                                            |
| Sarah                             | Rogers     |                       |                  | Waikato Hospital    | Hamilton, New Zealand                    | Research Coordinator                                    |                                                                                            |
| Livia                             | Schischka  |                       |                  | Waikato Hospital    | Hamilton, New Zealand                    | Research Coordinator                                    |                                                                                            |
| Kara                              | Trask      |                       |                  | Waikato Hospital    | Hamilton, New Zealand                    | Research Coordinator                                    |                                                                                            |
| April                             | Aguilar    |                       |                  | Wellington Hospital | Wellington, New Zealand                  | Research Assistant                                      |                                                                                            |
| Colin                             | Barnes     |                       |                  | Wellington Hospital | Wellington, New Zealand                  | Co-Investigator                                         |                                                                                            |
| Ben                               | Barry      |                       |                  | Wellington Hospital | Wellington, New Zealand                  | Co-Investigator                                         |                                                                                            |
| Niña                              | Beehre     |                       |                  | Wellington Hospital | Wellington, New Zealand                  | Research Coordinator                                    |                                                                                            |
| Kirsha                            | Delaney    |                       |                  | Wellington Hospital | Wellington, New Zealand                  | Research Coordinator                                    |                                                                                            |
| Dick                              | Dinsdale   |                       |                  | Wellington Hospital | Wellington, New Zealand                  | Co-Investigator                                         |                                                                                            |
| Kim                               | Grayson    |                       |                  | Wellington Hospital | Wellington, New Zealand                  | Co-Investigator                                         |                                                                                            |
| Deb                               | Hendry     |                       |                  | Wellington Hospital | Wellington, New Zealand                  | Research Coordinator                                    |                                                                                            |
| Anna                              | Hunt       |                       |                  | Wellington Hospital | Wellington, New Zealand                  | Research Coordinator                                    |                                                                                            |
| April                             | Jane       |                       |                  | Wellington Hospital | Wellington, New Zealand                  | Research Assistant                                      |                                                                                            |
| Harriet                           | Judd       |                       |                  | Wellington Hospital | Wellington, New Zealand                  | Research Coordinator                                    |                                                                                            |



Supplemental Online Content: Nonauthor Collaborators

\*First name, last name, and suffix (if applicable) are required and will appear in PubMed.

| *First Name and Middle Initial(s) | *Last Name   | *Suffix (eg, Jr, III) | Academic Degrees | Institution         | Location (city, state/province, country) | Role or Contribution, eg, chair, principal investigator | Group (if more than 1 Group listed in the byline) and/or Subgroup (eg, Steering Committee) |
|-----------------------------------|--------------|-----------------------|------------------|---------------------|------------------------------------------|---------------------------------------------------------|--------------------------------------------------------------------------------------------|
| Charlotte                         | Latimer-Bell |                       |                  | Wellington Hospital | Wellington, New Zealand                  | Research Coordinator                                    |                                                                                            |
| Cassie                            | Lawrence     |                       |                  | Wellington Hospital | Wellington, New Zealand                  | Research Coordinator                                    |                                                                                            |
| Eden                              | Lesona       |                       |                  | Wellington Hospital | Wellington, New Zealand                  | Research Coordinator                                    |                                                                                            |
| Rosie                             | Martin       |                       |                  | Wellington Hospital | Wellington, New Zealand                  | Research Coordinator                                    |                                                                                            |
| Agnes                             | Mckay Vucago |                       |                  | Wellington Hospital | Wellington, New Zealand                  | Research Coordinator                                    |                                                                                            |
| Alex                              | Millington   |                       |                  | Wellington Hospital | Wellington, New Zealand                  | Research Coordinator                                    |                                                                                            |
| James                             | Moore        |                       |                  | Wellington Hospital | Wellington, New Zealand                  | Co-Investigator                                         |                                                                                            |
| Leanlove                          | Navarra      |                       |                  | Wellington Hospital | Wellington, New Zealand                  | Research Manager                                        |                                                                                            |
| Shaanti                           | Olatunji     |                       |                  | Wellington Hospital | Wellington, New Zealand                  | Research Assistant                                      |                                                                                            |
| Alex                              | Psirides     |                       |                  | Wellington Hospital | Wellington, New Zealand                  | Co-Investigator                                         |                                                                                            |
| Yve                               | Robertson    |                       |                  | Wellington Hospital | Wellington, New Zealand                  | Research Coordinator                                    |                                                                                            |
| Hannah                            | Smellie      |                       |                  | Wellington Hospital | Wellington, New Zealand                  | Research Assistant                                      |                                                                                            |
| Rhoze                             | Sol Cruz     |                       |                  | Wellington Hospital | Wellington, New Zealand                  | Research Coordinator                                    |                                                                                            |
| Raulle                            | Sol Cuz      |                       |                  | Wellington Hospital | Wellington, New Zealand                  | Research Coordinator                                    |                                                                                            |
| Shawn                             | Sturland     |                       |                  | Wellington Hospital | Wellington, New Zealand                  | Co-Investigator                                         |                                                                                            |

## Supplemental Online Content: Nonauthor Collaborators

\*First name, last name, and suffix (if applicable) are required and will appear in PubMed.

| *First Name and Middle Initial(s) | *Last Name     | *Suffix (eg, Jr, III) | Academic Degrees | Institution                            | Location (city, state/province, country) | Role or Contribution, eg, chair, principal investigator | Group (if more than 1 Group listed in the byline) and/or Subgroup (eg, Steering Committee) |
|-----------------------------------|----------------|-----------------------|------------------|----------------------------------------|------------------------------------------|---------------------------------------------------------|--------------------------------------------------------------------------------------------|
| Kate                              | Tietjens       |                       |                  | Wellington Hospital                    | Wellington, New Zealand                  | Co-Investigator                                         |                                                                                            |
| Bob                               | Ure            |                       |                  | Wellington Hospital                    | Wellington, New Zealand                  | Co-Investigator                                         |                                                                                            |
| Lawrence                          | Walker         |                       |                  | Wellington Hospital                    | Wellington, New Zealand                  | Co-Investigator                                         |                                                                                            |
| Jason                             | Wright         |                       |                  | Wellington Hospital                    | Wellington, New Zealand                  | Co-Investigator                                         |                                                                                            |
| Chelsea                           | Young          |                       |                  | Wellington Hospital                    | Wellington, New Zealand                  | Research Coordinator                                    |                                                                                            |
| Sara                              | Andertun       |                       |                  | Helsingborg Hospital                   | Helsingborg, Sweden                      | Research Coordinator                                    |                                                                                            |
| Martin                            | Annborn        |                       |                  | Helsingborg Hospital                   | Helsingborg, Sweden                      | Principal Investigator                                  |                                                                                            |
| Maria                             | Nelderup       |                       |                  | Helsingborg Hospital                   | Helsingborg, Sweden                      | Research Coordinator                                    |                                                                                            |
| Lisa                              | Boström        |                       |                  | Skåne University Hospital, Lund        | Lund, Sweden                             | Principal Investigator                                  |                                                                                            |
| Susann                            | Schrey         |                       |                  | Skåne University Hospital, Lund        | Lund, Sweden                             | Research Coordinator                                    |                                                                                            |
| Marina                            | Larsson        |                       |                  | Skåne University Hospital Malmö        | Malmö, Sweden                            | Research Coordinator                                    |                                                                                            |
| Fredrik                           | Sjövall        |                       |                  | Skåne University Hospital Malmö        | Malmö, Sweden                            | Country Coordinator and Principal Investigator          |                                                                                            |
| Maria                             | Alvarez Corral |                       |                  | Basingstoke & North Hampshire Hospital | Basingstoke, United Kingdom              | Research Coordinator                                    |                                                                                            |
| Anthony                           | Ashton         |                       |                  | Basingstoke & North Hampshire Hospital | Basingstoke, United Kingdom              | Co-Investigator                                         |                                                                                            |
| Nicholas J                        | Cortes         |                       |                  | Basingstoke & North Hampshire Hospital | Basingstoke, United Kingdom              | Principal Investigator                                  |                                                                                            |
| Denise                            | Griffin        |                       |                  | Basingstoke & North Hampshire Hospital | Basingstoke, United Kingdom              | Research Coordinator                                    |                                                                                            |

## Supplemental Online Content: Nonauthor Collaborators

\*First name, last name, and suffix (if applicable) are required and will appear in PubMed.

| *First Name and Middle Initial(s) | *Last Name | *Suffix (eg, Jr, III) | Academic Degrees | Institution                            | Location (city, state/province, country) | Role or Contribution, eg, chair, principal investigator | Group (if more than 1 Group listed in the byline) and/or Subgroup (eg, Steering Committee) |
|-----------------------------------|------------|-----------------------|------------------|----------------------------------------|------------------------------------------|---------------------------------------------------------|--------------------------------------------------------------------------------------------|
| Nycola                            | Muchenje   |                       |                  | Basingstoke & North Hampshire Hospital | Basingstoke, United Kingdom              | Research Assistant                                      |                                                                                            |
| McDonald                          | Mupudzi    |                       |                  | Basingstoke & North Hampshire Hospital | Basingstoke, United Kingdom              | Research Coordinator                                    |                                                                                            |
| Dawn                              | Trodd      |                       |                  | Basingstoke & North Hampshire Hospital | Basingstoke, United Kingdom              | Research Coordinator                                    |                                                                                            |
| Leonie                            | Benham     |                       |                  | Blackpool Victoria Hospital            | Blackpool, United Kingdom                | Research Coordinator                                    |                                                                                            |
| Zena                              | Bradshaw   |                       |                  | Blackpool Victoria Hospital            | Blackpool, United Kingdom                | Research Coordinator                                    |                                                                                            |
| Gemma                             | Brown      |                       |                  | Blackpool Victoria Hospital            | Blackpool, United Kingdom                | Research Coordinator                                    |                                                                                            |
| Janette                           | Brown      |                       |                  | Blackpool Victoria Hospital            | Blackpool, United Kingdom                | Administrator                                           |                                                                                            |
| Jason                             | Cupitt     |                       |                  | Blackpool Victoria Hospital            | Blackpool, United Kingdom                | Principal Investigator                                  |                                                                                            |
| Lisa                              | Elawamy    |                       |                  | Blackpool Victoria Hospital            | Blackpool, United Kingdom                | Research Coordinator                                    |                                                                                            |
| Alan                              | Fahey      |                       |                  | Blackpool Victoria Hospital            | Blackpool, United Kingdom                | Administrator                                           |                                                                                            |
| James                             | Glen       |                       |                  | Blackpool Victoria Hospital            | Blackpool, United Kingdom                | Administrator                                           |                                                                                            |
| Shamina                           | Hankinson  |                       |                  | Blackpool Victoria Hospital            | Blackpool, United Kingdom                | Administrator                                           |                                                                                            |
| Gareth                            | Hardy      |                       |                  | Blackpool Victoria Hospital            | Blackpool, United Kingdom                | Principal Investigator                                  |                                                                                            |
| Jazmine                           | McCooley   |                       |                  | Blackpool Victoria Hospital            | Blackpool, United Kingdom                | Research Assistant                                      |                                                                                            |
| Sam                               | Remnant    |                       |                  | Blackpool Victoria Hospital            | Blackpool, United Kingdom                | Administrator                                           |                                                                                            |

## Supplemental Online Content: Nonauthor Collaborators

\*First name, last name, and suffix (if applicable) are required and will appear in PubMed.

| *First Name and Middle Initial(s) | *Last Name     | *Suffix (eg, Jr, III) | Academic Degrees | Institution                 | Location (city, state/province, country) | Role or Contribution, eg, chair, principal investigator | Group (if more than 1 Group listed in the byline) and/or Subgroup (eg, Steering Committee) |
|-----------------------------------|----------------|-----------------------|------------------|-----------------------------|------------------------------------------|---------------------------------------------------------|--------------------------------------------------------------------------------------------|
| Ella                              | Riedel         |                       |                  | Blackpool Victoria Hospital | Blackpool, United Kingdom                | Administrator                                           |                                                                                            |
| Emma                              | Stoddard       |                       |                  | Blackpool Victoria Hospital | Blackpool, United Kingdom                | Research Coordinator                                    |                                                                                            |
| Bhagawathi                        | Suryanarayanan |                       |                  | Blackpool Victoria Hospital | Blackpool, United Kingdom                | Co-Investigator                                         |                                                                                            |
| Lauren                            | Thornborough   |                       |                  | Blackpool Victoria Hospital | Blackpool, United Kingdom                | Administrator                                           |                                                                                            |
| Emma                              | Ward           |                       |                  | Blackpool Victoria Hospital | Blackpool, United Kingdom                | Co-Investigator                                         |                                                                                            |
| Scott                             | Warden         |                       |                  | Blackpool Victoria Hospital | Blackpool, United Kingdom                | Research Coordinator                                    |                                                                                            |
| Conor                             | Wilkinson      |                       |                  | Blackpool Victoria Hospital | Blackpool, United Kingdom                | Administrator                                           |                                                                                            |
| Jeremy                            | Bewley         |                       |                  | Bristol Royal Infirmary     | Bristol, United Kingdom                  | Principal Investigator                                  |                                                                                            |
| Anna                              | Chillingworth  |                       |                  | Bristol Royal Infirmary     | Bristol, United Kingdom                  | Research Coordinator                                    |                                                                                            |
| Georgia                           | Efford         |                       |                  | Bristol Royal Infirmary     | Bristol, United Kingdom                  | Research Coordinator                                    |                                                                                            |
| Zoe                               | Garland        |                       |                  | Bristol Royal Infirmary     | Bristol, United Kingdom                  | Research Coordinator                                    |                                                                                            |
| Lisa                              | Grimmer        |                       |                  | Bristol Royal Infirmary     | Bristol, United Kingdom                  | Research Coordinator                                    |                                                                                            |
| Rebekah                           | Johnson        |                       |                  | Bristol Royal Infirmary     | Bristol, United Kingdom                  | Research Coordinator                                    |                                                                                            |
| Katie                             | Sweet          |                       |                  | Bristol Royal Infirmary     | Bristol, United Kingdom                  | Research Coordinator                                    |                                                                                            |
| Denise                            | Webster        |                       |                  | Bristol Royal Infirmary     | Bristol, United Kingdom                  | Research Coordinator                                    |                                                                                            |
| Kim                               | Kim Wright     |                       |                  | Bristol Royal Infirmary     | Bristol, United Kingdom                  | Research Coordinator                                    |                                                                                            |

## Supplemental Online Content: Nonauthor Collaborators

\*First name, last name, and suffix (if applicable) are required and will appear in PubMed.

| *First Name and Middle Initial(s) | *Last Name    | *Suffix (eg, Jr, III) | Academic Degrees | Institution                  | Location (city, state/province, country) | Role or Contribution, eg, chair, principal investigator | Group (if more than 1 Group listed in the byline) and/or Subgroup (eg, Steering Committee) |
|-----------------------------------|---------------|-----------------------|------------------|------------------------------|------------------------------------------|---------------------------------------------------------|--------------------------------------------------------------------------------------------|
| Mandy                             | Austin        |                       |                  | Broomfield Hospital          | Chelmsford, Essex, United Kingdom        | Research Coordinator                                    |                                                                                            |
| Vallish                           | Bhardwaj      |                       |                  | Broomfield Hospital          | Chelmsford, Essex, United Kingdom        | Co-Investigator                                         |                                                                                            |
| Stacey                            | Cotterell     |                       |                  | Broomfield Hospital          | Chelmsford, Essex, United Kingdom        | Research Coordinator                                    |                                                                                            |
| Fiona                             | McNeela       |                       |                  | Broomfield Hospital          | Chelmsford, Essex, United Kingdom        | Research Coordinator                                    |                                                                                            |
| Victoria                          | Mead          |                       |                  | Broomfield Hospital          | Chelmsford, Essex, United Kingdom        | Research Coordinator                                    |                                                                                            |
| Lauren                            | Perkins       |                       |                  | Broomfield Hospital          | Chelmsford, Essex, United Kingdom        | Research Coordinator                                    |                                                                                            |
| Jayachandran                      | Radhakrishnan |                       |                  | Broomfield Hospital          | Chelmsford, Essex, United Kingdom        | Principal Investigator                                  |                                                                                            |
| Sue                               | Smolen        |                       |                  | Broomfield Hospital          | Chelmsford, Essex, United Kingdom        | Research Coordinator                                    |                                                                                            |
| Christopher                       | Westall       |                       |                  | Broomfield Hospital          | Chelmsford, Essex, United Kingdom        | Co-Investigator                                         |                                                                                            |
| David                             | Antcliffe     |                       |                  | Charing Cross Hospital       | London, United Kingdom                   | Principal Investigator                                  |                                                                                            |
| Ziortza                           | Fernandez     |                       |                  | Charing Cross Hospital       | London, United Kingdom                   | Research Coordinator                                    |                                                                                            |
| Eleanor                           | Jepson        |                       |                  | Charing Cross Hospital       | London, United Kingdom                   | Research Coordinator                                    |                                                                                            |
| Roceld                            | Rojo          |                       |                  | Charing Cross Hospital       | London, United Kingdom                   | Research Coordinator                                    |                                                                                            |
| Anita                             | Tamang Gurung |                       |                  | Charing Cross Hospital       | London, United Kingdom                   | Research Coordinator                                    |                                                                                            |
| Maie                              | Templeton     |                       |                  | Charing Cross Hospital       | London, United Kingdom                   | Research Manager                                        |                                                                                            |
| Delores                           | Beach         |                       |                  | Countess of Chester Hospital | Chester, United Kingdom                  | Pharmacist                                              |                                                                                            |
| Melanie                           | Colegrove     |                       |                  | Countess of Chester Hospital | Chester, United Kingdom                  | Pharmacist                                              |                                                                                            |

## Supplemental Online Content: Nonauthor Collaborators

\*First name, last name, and suffix (if applicable) are required and will appear in PubMed.

| *First Name and Middle Initial(s) | *Last Name        | *Suffix (eg, Jr, III) | Academic Degrees | Institution                  | Location (city, state/province, country) | Role or Contribution, eg, chair, principal investigator | Group (if more than 1 Group listed in the byline) and/or Subgroup (eg, Steering Committee) |
|-----------------------------------|-------------------|-----------------------|------------------|------------------------------|------------------------------------------|---------------------------------------------------------|--------------------------------------------------------------------------------------------|
| Maria                             | Faulkner          |                       |                  | Countess of Chester Hospital | Chester, United Kingdom                  | Research Coordinator                                    |                                                                                            |
| Laura                             | McKay             |                       |                  | Countess of Chester Hospital | Chester, United Kingdom                  | Research Coordinator                                    |                                                                                            |
| Jos                               | Wickett           |                       |                  | Countess of Chester Hospital | Chester, United Kingdom                  | Pharmacist                                              |                                                                                            |
| Laurence                          | Wilson            |                       |                  | Countess of Chester Hospital | Chester, United Kingdom                  | Principal Investigator                                  |                                                                                            |
| Zakaulla                          | Belagodu          |                       |                  | Darent Valley Hospital       | Dartford, United Kingdom                 | Principal Investigator                                  |                                                                                            |
| Ryan                              | Coe               |                       |                  | Darent Valley Hospital       | Dartford, United Kingdom                 | Clinical Trials Administrator                           |                                                                                            |
| Katy                              | Collins           |                       |                  | Darent Valley Hospital       | Dartford, United Kingdom                 | Research Coordinator                                    |                                                                                            |
| Charlotte                         | Kamundi           |                       |                  | Darent Valley Hospital       | Dartford, United Kingdom                 | Research Coordinator                                    |                                                                                            |
| Naomi                             | Oakley            |                       |                  | Darent Valley Hospital       | Dartford, United Kingdom                 | Clinical Trials Administrator                           |                                                                                            |
| Carmel                            | Stuart            |                       |                  | Darent Valley Hospital       | Dartford, United Kingdom                 | Clinical Trials Practitioner                            |                                                                                            |
| Nikitas                           | Nikitas           |                       |                  | Derriford Hospital           | Plymouth, United Kingdom                 | Principal Investigator                                  |                                                                                            |
| Ana                               | Sanchez-Rodriguez |                       |                  | Derriford Hospital           | Plymouth, United Kingdom                 | Research Coordinator                                    |                                                                                            |
| Kayleigh                          | Spencer           |                       |                  | Derriford Hospital           | Plymouth, United Kingdom                 | Research Coordinator                                    |                                                                                            |
| Liana                             | Stapleton         |                       |                  | Derriford Hospital           | Plymouth, United Kingdom                 | Research Coordinator                                    |                                                                                            |
| Bethan                            | Stowe             |                       |                  | Derriford Hospital           | Plymouth, United Kingdom                 | Research Coordinator                                    |                                                                                            |
| Colin                             | Wells             |                       |                  | Derriford Hospital           | Plymouth, United Kingdom                 | Research Coordinator                                    |                                                                                            |

## Supplemental Online Content: Nonauthor Collaborators

\*First name, last name, and suffix (if applicable) are required and will appear in PubMed.

| *First Name and Middle Initial(s) | *Last Name | *Suffix (eg, Jr, III) | Academic Degrees | Institution            | Location (city, state/province, country) | Role or Contribution, eg, chair, principal investigator | Group (if more than 1 Group listed in the byline) and/or Subgroup (eg, Steering Committee) |
|-----------------------------------|------------|-----------------------|------------------|------------------------|------------------------------------------|---------------------------------------------------------|--------------------------------------------------------------------------------------------|
| Sarah                             | Doyle      |                       |                  | Dorset County Hospital | Dorchester, United Kingdom               | Research Coordinator                                    |                                                                                            |
| Stephanie                         | Dukes      |                       |                  | Dorset County Hospital | Dorchester, United Kingdom               | Research Assistant                                      |                                                                                            |
| Sarah                             | Horton     |                       |                  | Dorset County Hospital | Dorchester, United Kingdom               | Research Coordinator                                    |                                                                                            |
| James                             | Rees       |                       |                  | Dorset County Hospital | Dorchester, United Kingdom               | Research Manager                                        |                                                                                            |
| Mark                              | Shortland  |                       |                  | Dorset County Hospital | Dorchester, United Kingdom               | Pharmacist                                              |                                                                                            |
| Ruth                              | Thomas     |                       |                  | Dorset County Hospital | Dorchester, United Kingdom               | Principal Investigator                                  |                                                                                            |
| Sophie                            | Webber     |                       |                  | Dorset County Hospital | Dorchester, United Kingdom               | Pharmacist                                              |                                                                                            |
| Trish                             | Williams   |                       |                  | Dorset County Hospital | Dorchester, United Kingdom               | Research Coordinator                                    |                                                                                            |
| Lauren                            | Butler     |                       |                  | Freeman Hospital       | Newcastle upon Tyne, United Kingdom      | Research Coordinator                                    |                                                                                            |
| Leigh                             | Dunn       |                       |                  | Freeman Hospital       | Newcastle upon Tyne, United Kingdom      | Research Coordinator                                    |                                                                                            |
| Arti                              | Gulati     |                       |                  | Freeman Hospital       | Newcastle upon Tyne, United Kingdom      | Research Coordinator                                    |                                                                                            |
| Jonathan                          | Shelton    |                       |                  | Freeman Hospital       | Newcastle upon Tyne, United Kingdom      | Principal Investigator                                  |                                                                                            |
| Yvonne                            | Bland      |                       |                  | Frimley Park Hospital  | Frimley, Camberley, United Kingdom       | Research Coordinator                                    |                                                                                            |
| Lianne                            | Chapman    |                       |                  | Frimley Park Hospital  | Frimley, Camberley, United Kingdom       | Research Coordinator                                    |                                                                                            |
| Rozzie                            | Dolman     |                       |                  | Frimley Park Hospital  | Frimley, Camberley, United Kingdom       | Research Coordinator                                    |                                                                                            |

## Supplemental Online Content: Nonauthor Collaborators

\*First name, last name, and suffix (if applicable) are required and will appear in PubMed.

| *First Name and Middle Initial(s) | *Last Name | *Suffix (eg, Jr, III) | Academic Degrees | Institution                      | Location (city, state/province, country) | Role or Contribution, eg, chair, principal investigator | Group (if more than 1 Group listed in the byline) and/or Subgroup (eg, Steering Committee) |
|-----------------------------------|------------|-----------------------|------------------|----------------------------------|------------------------------------------|---------------------------------------------------------|--------------------------------------------------------------------------------------------|
| George                            | Evetts     |                       |                  | Frimley Park Hospital            | Frimley, Camberley, United Kingdom       | Principal Investigator                                  |                                                                                            |
| Danni                             | Greener    |                       |                  | Frimley Park Hospital            | Frimley, Camberley, United Kingdom       | Co-Investigator                                         |                                                                                            |
| Istvan                            | Kajtor     |                       |                  | Frimley Park Hospital            | Frimley, Camberley, United Kingdom       | Principal Investigator                                  |                                                                                            |
| Stephen                           | Lewis      |                       |                  | Frimley Park Hospital            | Frimley, Camberley, United Kingdom       | Co-Investigator                                         |                                                                                            |
| Cat                               | Lumby      |                       |                  | Frimley Park Hospital            | Frimley, Camberley, United Kingdom       | Co-Investigator                                         |                                                                                            |
| Helen                             | Rayner     |                       |                  | Frimley Park Hospital            | Frimley, Camberley, United Kingdom       | Co-Investigator                                         |                                                                                            |
| Susanne                           | Cathcart   |                       |                  | Glasgow Royal Infirmary          | Glasgow, United Kingdom                  | Research Coordinator                                    |                                                                                            |
| Pamela                            | MacTavish  |                       |                  | Glasgow Royal Infirmary          | Glasgow, United Kingdom                  | Research Manager                                        |                                                                                            |
| Kathryn                           | Puxty      |                       |                  | Glasgow Royal Infirmary          | Glasgow, United Kingdom                  | Principal Investigator                                  |                                                                                            |
| Christine                         | Aitken     |                       |                  | Golden Jubilee National Hospital | Clydebank, Scotland, United Kingdom      | Research Coordinator                                    |                                                                                            |
| Elizabeth                         | Boyd       |                       |                  | Golden Jubilee National Hospital | Clydebank, Scotland, United Kingdom      | Research Coordinator                                    |                                                                                            |
| Julie                             | Buckley    |                       |                  | Golden Jubilee National Hospital | Clydebank, Scotland, United Kingdom      | Research Coordinator                                    |                                                                                            |
| Charlene                          | Hamilton   |                       |                  | Golden Jubilee National Hospital | Clydebank, Scotland, United Kingdom      | Research Coordinator                                    |                                                                                            |
| Ilkin                             | Kasmani    |                       |                  | Golden Jubilee National Hospital | Clydebank, Scotland, United Kingdom      | Co-Investigator                                         |                                                                                            |
| Thomas                            | Keast      |                       |                  | Golden Jubilee National Hospital | Clydebank, Scotland, United Kingdom      | Co-Investigator                                         |                                                                                            |



## Supplemental Online Content: Nonauthor Collaborators

\*First name, last name, and suffix (if applicable) are required and will appear in PubMed.

| *First Name and Middle Initial(s) | *Last Name  | *Suffix (eg, Jr, III) | Academic Degrees | Institution                      | Location (city, state/province, country) | Role or Contribution, eg, chair, principal investigator | Group (if more than 1 Group listed in the byline) and/or Subgroup (eg, Steering Committee) |
|-----------------------------------|-------------|-----------------------|------------------|----------------------------------|------------------------------------------|---------------------------------------------------------|--------------------------------------------------------------------------------------------|
| Phil                              | McCall      |                       |                  | Golden Jubilee National Hospital | Clydebank, Scotland, United Kingdom      | Co-investigator                                         |                                                                                            |
| Ruth                              | McLaren     |                       |                  | Golden Jubilee National Hospital | Clydebank, Scotland, United Kingdom      | Research Coordinator                                    |                                                                                            |
| Ben                               | Shelley     |                       |                  | Golden Jubilee National Hospital | Clydebank, Scotland, United Kingdom      | Principal Investigator                                  |                                                                                            |
| Sonia                             | Sousa Arias |                       |                  | Hammersmith Hospital             | London, United Kingdom                   | Research Coordinator                                    |                                                                                            |
| Jenny                             | Wong        |                       |                  | Hammersmith Hospital             | London, United Kingdom                   | Research Coordinator                                    |                                                                                            |
| Susan                             | Anderson    |                       |                  | Hereford County Hospital         | Hereford, United Kingdom                 | Research Coordinator                                    |                                                                                            |
| Eleanor                           | Andrews     |                       |                  | Hereford County Hospital         | Hereford, United Kingdom                 | Research Manager                                        |                                                                                            |
| Janine                            | Birch       |                       |                  | Hereford County Hospital         | Hereford, United Kingdom                 | Research Coordinator                                    |                                                                                            |
| Emma                              | Collins     |                       |                  | Hereford County Hospital         | Hereford, United Kingdom                 | Research Coordinator                                    |                                                                                            |
| Mark                              | Forrest     |                       |                  | Hereford County Hospital         | Hereford, United Kingdom                 | Co-Investigator                                         |                                                                                            |
| Surpreet                          | Grewal      |                       |                  | Hereford County Hospital         | Hereford, United Kingdom                 | Co-Investigator                                         |                                                                                            |
| Kate                              | Hammerton   |                       |                  | Hereford County Hospital         | Hereford, United Kingdom                 | Research Coordinator                                    |                                                                                            |
| Andrew                            | Holland     |                       |                  | Hereford County Hospital         | Hereford, United Kingdom                 | Co-Investigator                                         |                                                                                            |
| Robin                             | Jootun      |                       |                  | Hereford County Hospital         | Hereford, United Kingdom                 | Co-Investigator                                         |                                                                                            |
| Ryan                              | O'Leary     |                       |                  | Hereford County Hospital         | Hereford, United Kingdom                 | Principal Investigator                                  |                                                                                            |

## Supplemental Online Content: Nonauthor Collaborators

\*First name, last name, and suffix (if applicable) are required and will appear in PubMed.

| *First Name and Middle Initial(s) | *Last Name  | *Suffix (eg, Jr, III) | Academic Degrees | Institution                    | Location (city, state/province, country) | Role or Contribution, eg, chair, principal investigator | Group (if more than 1 Group listed in the byline) and/or Subgroup (eg, Steering Committee) |
|-----------------------------------|-------------|-----------------------|------------------|--------------------------------|------------------------------------------|---------------------------------------------------------|--------------------------------------------------------------------------------------------|
| Kyaw                              | Pyae Soan   |                       |                  | Hereford County Hospital       | Hereford, United Kingdom                 | Co-Investigator                                         |                                                                                            |
| Carl                              | Stevenson   |                       |                  | Hereford County Hospital       | Hereford, United Kingdom                 | Co-Investigator                                         |                                                                                            |
| Samantha                          | Summers     |                       |                  | Hereford County Hospital       | Hereford, United Kingdom                 | Co-Investigator                                         |                                                                                            |
| Laura                             | Troth       |                       |                  | Hereford County Hospital       | Hereford, United Kingdom                 | Co-Investigator                                         |                                                                                            |
| Louise                            | Foster      |                       |                  | Hull Royal Infirmary           | Hull, United Kingdom                     | Research Coordinator                                    |                                                                                            |
| Andrew                            | Gratrix     |                       |                  | Hull Royal Infirmary           | Hull, United Kingdom                     | Principal Investigator                                  |                                                                                            |
| Matthew                           | Hines       |                       |                  | Hull Royal Infirmary           | Hull, United Kingdom                     | Research Coordinator                                    |                                                                                            |
| Victoria                          | Martinson   |                       |                  | Hull Royal Infirmary           | Hull, United Kingdom                     | Research Coordinator                                    |                                                                                            |
| Vanessa                           | Rivers      |                       |                  | Hull Royal Infirmary           | Hull, United Kingdom                     | Research Coordinator                                    |                                                                                            |
| Elizabeth                         | Stones      |                       |                  | Hull Royal Infirmary           | Hull, United Kingdom                     | Research Coordinator                                    |                                                                                            |
| Sarah                             | Bartholomew |                       |                  | Ipswich Hospital               | Ipswich, United Kingdom                  | Research Manager                                        |                                                                                            |
| Stephanie                         | Bell        |                       |                  | Ipswich Hospital               | Ipswich, United Kingdom                  | Research Coordinator                                    |                                                                                            |
| Kate                              | Turner      |                       |                  | Ipswich Hospital               | Ipswich, United Kingdom                  | Principal Investigator                                  |                                                                                            |
| Karen                             | Winter      |                       |                  | Ipswich Hospital               | Ipswich, United Kingdom                  | Research Coordinator                                    |                                                                                            |
| Uwe                               | Franke      |                       |                  | James Cook University Hospital | Middlesbrough, United Kingdom            | Principal Investigator                                  |                                                                                            |
| Evie                              | Headlam     |                       |                  | James Cook University Hospital | Middlesbrough, United Kingdom            | Research Coordinator                                    |                                                                                            |
| Keith                             | Hugill      |                       |                  | James Cook University Hospital | Middlesbrough, United Kingdom            | Research Coordinator                                    |                                                                                            |

## Supplemental Online Content: Nonauthor Collaborators

\*First name, last name, and suffix (if applicable) are required and will appear in PubMed.

| *First Name and Middle Initial(s) | *Last Name | *Suffix (eg, Jr, III) | Academic Degrees | Institution                    | Location (city, state/province, country) | Role or Contribution, eg, chair, principal investigator | Group (if more than 1 Group listed in the byline) and/or Subgroup (eg, Steering Committee) |
|-----------------------------------|------------|-----------------------|------------------|--------------------------------|------------------------------------------|---------------------------------------------------------|--------------------------------------------------------------------------------------------|
| Jessica                           | Jones      |                       |                  | James Cook University Hospital | Middlesbrough, United Kingdom            | Research Coordinator                                    |                                                                                            |
| Abigail                           | List       |                       |                  | James Cook University Hospital | Middlesbrough, United Kingdom            | Research Coordinator                                    |                                                                                            |
| Joanne                            | Morley     |                       |                  | James Cook University Hospital | Middlesbrough, United Kingdom            | Research Coordinator                                    |                                                                                            |
| Tracy                             | Ruddick    |                       |                  | James Cook University Hospital | Middlesbrough, United Kingdom            | Research Coordinator                                    |                                                                                            |
| Amy                               | Thompson   |                       |                  | James Cook University Hospital | Middlesbrough, United Kingdom            | Research Coordinator                                    |                                                                                            |
| Nikkita                           | Adams      |                       |                  | Kings College Hospital         | London, United Kingdom                   | Research Coordinator                                    |                                                                                            |
| Emma                              | Clarey     |                       |                  | King's College Hospital        | London, United Kingdom                   | Research Coordinator                                    |                                                                                            |
| Maeve                             | Cockrell   |                       |                  | King's College Hospital        | London, United Kingdom                   | Research Coordinator                                    |                                                                                            |
| Ele                               | Corcoran   |                       |                  | King's College Hospital        | London, United Kingdom                   | Research Coordinator                                    |                                                                                            |
| Maria                             | Depante    |                       |                  | King's College Hospital        | London, United Kingdom                   | Research Coordinator                                    |                                                                                            |
| Clare                             | Finney     |                       |                  | King's College Hospital        | London, United Kingdom                   | Research Coordinator                                    |                                                                                            |
| Aparna                            | George     |                       |                  | King's College Hospital        | London, United Kingdom                   | Research Coordinator                                    |                                                                                            |
| Philip                            | Hopkins    |                       |                  | King's College Hospital        | London, United Kingdom                   | Co-investigator                                         |                                                                                            |
| Nauman                            | Hussain    |                       |                  | King's College Hospital        | London, United Kingdom                   | Principal Investigator                                  |                                                                                            |
| Reena                             | Mehta      |                       |                  | King's College Hospital        | London, United Kingdom                   | Principal Investigator                                  |                                                                                            |
| Kevin                             | O'Reilly   |                       |                  | King's College Hospital        | London, United Kingdom                   | Research Coordinator                                    |                                                                                            |
| Mandeep                           | Phull      |                       |                  | King's College Hospital        | London, United Kingdom                   | Research Assistant                                      |                                                                                            |

## Supplemental Online Content: Nonauthor Collaborators

\*First name, last name, and suffix (if applicable) are required and will appear in PubMed.

| *First Name and Middle Initial(s) | *Last Name    | *Suffix (eg, Jr, III) | Academic Degrees | Institution             | Location (city, state/province, country) | Role or Contribution, eg, chair, principal investigator | Group (if more than 1 Group listed in the byline) and/or Subgroup (eg, Steering Committee) |
|-----------------------------------|---------------|-----------------------|------------------|-------------------------|------------------------------------------|---------------------------------------------------------|--------------------------------------------------------------------------------------------|
| John                              | Smith         |                       |                  | King's College Hospital | London, United Kingdom                   | Research Coordinator                                    |                                                                                            |
| Mandy                             | Gill          |                       |                  | King's Mill Hospital    | Sutton-in-Ashfield, United Kingdom       | Research Coordinator                                    |                                                                                            |
| Jill                              | Kirk          |                       |                  | King's Mill Hospital    | Sutton-in-Ashfield, United Kingdom       | Research Coordinator                                    |                                                                                            |
| Pulak                             | Paul          |                       |                  | King's Mill Hospital    | Sutton-in-Ashfield, United Kingdom       | Principal Investigator                                  |                                                                                            |
| Sarah                             | Shelton       |                       |                  | King's Mill Hospital    | Sutton-in-Ashfield, United Kingdom       | Research Coordinator                                    |                                                                                            |
| Hanan                             | Abdullise     |                       |                  | Kingston Hospital       | Kingston upon Thames, United Kingdom     | Co-Investigator                                         |                                                                                            |
| Samantha                          | Bacciarelli   |                       |                  | Kingston Hospital       | Kingston upon Thames, United Kingdom     | Co-Investigator                                         |                                                                                            |
| Julia                             | Balcioglu     |                       |                  | Kingston Hospital       | Kingston upon Thames, United Kingdom     | Research Coordinator                                    |                                                                                            |
| Isabel                            | Bradley       |                       |                  | Kingston Hospital       | Kingston upon Thames, United Kingdom     | Research Coordinator                                    |                                                                                            |
| Sabrina                           | Carta         |                       |                  | Kingston Hospital       | Kingston upon Thames, United Kingdom     | Co-Investigator                                         |                                                                                            |
| Rebecca                           | Crowe         |                       |                  | Kingston Hospital       | Kingston upon Thames, United Kingdom     | Research Coordinator                                    |                                                                                            |
| Marion                            | Gillespie     |                       |                  | Kingston Hospital       | Kingston upon Thames, United Kingdom     | Research Coordinator                                    |                                                                                            |
| Margaret                          | Grout         |                       |                  | Kingston Hospital       | Kingston upon Thames, United Kingdom     | Research Coordinator                                    |                                                                                            |
| Rosaleen                          | Herdman-Grant |                       |                  | Kingston Hospital       | Kingston upon Thames, United Kingdom     | Co-Investigator                                         |                                                                                            |
| Olumayowa                         | Ogunwemimo    |                       |                  | Kingston Hospital       | Kingston upon Thames, United Kingdom     | Co-Investigator                                         |                                                                                            |

## Supplemental Online Content: Nonauthor Collaborators

\*First name, last name, and suffix (if applicable) are required and will appear in PubMed.

| *First Name and Middle Initial(s) | *Last Name     | *Suffix (eg, Jr, III) | Academic Degrees | Institution              | Location (city, state/province, country) | Role or Contribution, eg, chair, principal investigator | Group (if more than 1 Group listed in the byline) and/or Subgroup (eg, Steering Committee) |
|-----------------------------------|----------------|-----------------------|------------------|--------------------------|------------------------------------------|---------------------------------------------------------|--------------------------------------------------------------------------------------------|
| Nicole                            | Richard        |                       |                  | Kingston Hospital        | Kingston upon Thames, United Kingdom     | Principal Investigator                                  |                                                                                            |
| Kathryn                           | Sollesta       |                       |                  | Kingston Hospital        | Kingston upon Thames, United Kingdom     | Research Coordinator                                    |                                                                                            |
| Andrew                            | Swain          |                       |                  | Kingston Hospital        | Kingston upon Thames, United Kingdom     | Research Coordinator                                    |                                                                                            |
| Joan                              | Willis         |                       |                  | Kingston Hospital        | Kingston upon Thames, United Kingdom     | Research Coordinator                                    |                                                                                            |
| Miriam                            | Davey          |                       |                  | Maidstone Hospital       | Maidstone, United Kingdom                | Research Coordinator                                    |                                                                                            |
| Rebecca                           | Seaman         |                       |                  | Maidstone Hospital       | Maidstone, United Kingdom                | Research Coordinator                                    |                                                                                            |
| James                             | Wood           |                       |                  | Maidstone Hospital       | Maidstone, United Kingdom                | Principal Investigator                                  |                                                                                            |
| Iram                              | Ahmed          |                       |                  | Medway Maritime Hospital | Kent, United Kingdom                     | Research Coordinator                                    |                                                                                            |
| Rebecca                           | Collins        |                       |                  | Medway Maritime Hospital | Kent, United Kingdom                     | Research Coordinator                                    |                                                                                            |
| Tessa                             | Glazebrook     |                       |                  | Medway Maritime Hospital | Kent, United Kingdom                     | Clinical Trials Practitioner                            |                                                                                            |
| Paul                              | Hayden         |                       |                  | Medway Maritime Hospital | Kent, United Kingdom                     | Principal Investigator                                  |                                                                                            |
| Thyra                             | Khyere Diaborr |                       |                  | Medway Maritime Hospital | Kent, United Kingdom                     | Clinical Trials Practitioner                            |                                                                                            |
| Robert                            | Musalagani     |                       |                  | Medway Maritime Hospital | Kent, United Kingdom                     | Research Coordinator                                    |                                                                                            |
| Linda                             | Ofori          |                       |                  | Medway Maritime Hospital | Kent, United Kingdom                     | Research Coordinator                                    |                                                                                            |
| Vonganyi                          | Ogbeide        |                       |                  | Medway Maritime Hospital | Kent, United Kingdom                     | Research Coordinator                                    |                                                                                            |
| Sandra                            | Sowah          |                       |                  | Medway Maritime Hospital | Kent, United Kingdom                     | Pharmacist                                              |                                                                                            |

## Supplemental Online Content: Nonauthor Collaborators

\*First name, last name, and suffix (if applicable) are required and will appear in PubMed.

| *First Name and Middle Initial(s) | *Last Name | *Suffix (eg, Jr, III) | Academic Degrees | Institution                                    | Location (city, state/province, country) | Role or Contribution, eg, chair, principal investigator | Group (if more than 1 Group listed in the byline) and/or Subgroup (eg, Steering Committee) |
|-----------------------------------|------------|-----------------------|------------------|------------------------------------------------|------------------------------------------|---------------------------------------------------------|--------------------------------------------------------------------------------------------|
| Rebecca                           | Squires    |                       |                  | Medway Maritime Hospital                       | Kent, United Kingdom                     | Research Coordinator                                    |                                                                                            |
| Louise                            | Mew        |                       |                  | Milton Keynes University Hospital              | Milton Keynes, United Kingdom            | Research Coordinator                                    |                                                                                            |
| James                             | Pocock     |                       |                  | Milton Keynes University Hospital              | Milton Keynes, United Kingdom            | Co-Investigator                                         |                                                                                            |
| Richard                           | Stewart    |                       |                  | Milton Keynes University Hospital              | Milton Keynes, United Kingdom            | Principal Investigator                                  |                                                                                            |
| Sara Beth                         | Sutherland |                       |                  | Milton Keynes University Hospital              | Milton Keynes, United Kingdom            | Research Coordinator                                    |                                                                                            |
| Pauline                           | Austin     |                       |                  | Ninewells Hospital                             | Dundee, United Kingdom                   | Principal Investigator                                  |                                                                                            |
| Louise                            | Cabrelli   |                       |                  | Ninewells Hospital                             | Dundee, United Kingdom                   | Research Coordinator                                    |                                                                                            |
| Matthew                           | Casey      |                       |                  | Ninewells Hospital                             | Dundee, United Kingdom                   | Co-Investigator                                         |                                                                                            |
| Susan                             | Chapman    |                       |                  | Ninewells Hospital                             | Dundee, United Kingdom                   | Co-Investigator                                         |                                                                                            |
| Hayley                            | McKie      |                       |                  | Northumbria Specialist Emergency Care Hospital | Cramlington, United Kingdom              | Research Coordinator                                    |                                                                                            |
| Jessica                           | Reynolds   |                       |                  | Northumbria Specialist Emergency Care Hospital | Cramlington, United Kingdom              | Clinical Trials Practitioner                            |                                                                                            |
| Tracy                             | Smith      |                       |                  | Northumbria Specialist Emergency Care Hospital | Cramlington, United Kingdom              | Clinical Trials Practitioner                            |                                                                                            |
| Gail                              | Waddell    |                       |                  | Northumbria Specialist Emergency Care Hospital | Cramlington, United Kingdom              | Clinical Trials Practitioner                            |                                                                                            |
| Jack                              | Wilkinson  |                       |                  | Northumbria Specialist Emergency Care Hospital | Cramlington, United Kingdom              | Co-Investigator                                         |                                                                                            |
| Bryan                             | Yates      |                       |                  | Northumbria Specialist Emergency Care Hospital | Cramlington, United Kingdom              | Principal Investigator                                  |                                                                                            |

## Supplemental Online Content: Nonauthor Collaborators

\*First name, last name, and suffix (if applicable) are required and will appear in PubMed.

| *First Name and Middle Initial(s) | *Last Name  | *Suffix (eg, Jr, III) | Academic Degrees | Institution           | Location (city, state/province, country) | Role or Contribution, eg, chair, principal investigator | Group (if more than 1 Group listed in the byline) and/or Subgroup (eg, Steering Committee) |
|-----------------------------------|-------------|-----------------------|------------------|-----------------------|------------------------------------------|---------------------------------------------------------|--------------------------------------------------------------------------------------------|
| Ali                               | Alayan      |                       |                  | Pinderfields Hospital | Wakefield, United Kingdom                | Co-Investigator                                         |                                                                                            |
| Andrew                            | Ashcroft    |                       |                  | Pinderfields Hospital | Wakefield, United Kingdom                | Co-Investigator                                         |                                                                                            |
| Sarah                             | Buckley     |                       |                  | Pinderfields Hospital | Wakefield, United Kingdom                | Research Coordinator                                    |                                                                                            |
| Elizabeth                         | Denis       |                       |                  | Pinderfields Hospital | Wakefield, United Kingdom                | Research Assistant                                      |                                                                                            |
| Lucy                              | Gurr        |                       |                  | Pinderfields Hospital | Wakefield, United Kingdom                | Co-Investigator                                         |                                                                                            |
| Amy                               | Major       |                       |                  | Pinderfields Hospital | Wakefield, United Kingdom                | Research Coordinator                                    |                                                                                            |
| Alex                              | Metcalfe    |                       |                  | Pinderfields Hospital | Wakefield, United Kingdom                | Research Coordinator                                    |                                                                                            |
| Alice                             | Poole       |                       |                  | Pinderfields Hospital | Wakefield, United Kingdom                | Co-Investigator                                         |                                                                                            |
| Alistair                          | Rose        |                       |                  | Pinderfields Hospital | Wakefield, United Kingdom                | Principal Investigator                                  |                                                                                            |
| Brendan                           | Sloan       |                       |                  | Pinderfields Hospital | Wakefield, United Kingdom                | Principal Investigator                                  |                                                                                            |
| Sharwend                          | Supermanian |                       |                  | Pinderfields Hospital | Wakefield, United Kingdom                | Co-Investigator                                         |                                                                                            |
| Nicola                            | Thompson    |                       |                  | Pinderfields Hospital | Wakefield, United Kingdom                | Co-Investigator                                         |                                                                                            |
| Katie                             | Wilson      |                       |                  | Pinderfields Hospital | Wakefield, United Kingdom                | Co-Investigator                                         |                                                                                            |
| Julie                             | Camsooksai  |                       |                  | Poole Hospital        | Poole, United Kingdom                    | Research Coordinator                                    |                                                                                            |
| Yasmin                            | De'Ath      |                       |                  | Poole Hospital        | Poole, United Kingdom                    | Research Coordinator                                    |                                                                                            |

## Supplemental Online Content: Nonauthor Collaborators

\*First name, last name, and suffix (if applicable) are required and will appear in PubMed.

| *First Name and Middle Initial(s) | *Last Name  | *Suffix (eg, Jr, III) | Academic Degrees | Institution             | Location (city, state/province, country) | Role or Contribution, eg, chair, principal investigator | Group (if more than 1 Group listed in the byline) and/or Subgroup (eg, Steering Committee) |
|-----------------------------------|-------------|-----------------------|------------------|-------------------------|------------------------------------------|---------------------------------------------------------|--------------------------------------------------------------------------------------------|
| Sarah                             | Jenkins     |                       |                  | Poole Hospital          | Poole, United Kingdom                    | Research Coordinator                                    |                                                                                            |
| Emma                              | Langridge   |                       |                  | Poole Hospital          | Poole, United Kingdom                    | Research Coordinator                                    |                                                                                            |
| Rebecca                           | Miln        |                       |                  | Poole Hospital          | Poole, United Kingdom                    | Research Coordinator                                    |                                                                                            |
| Sarah                             | Patch       |                       |                  | Poole Hospital          | Poole, United Kingdom                    | Research Coordinator                                    |                                                                                            |
| Magda                             | Pomichowska |                       |                  | Poole Hospital          | Poole, United Kingdom                    | Research Coordinator                                    |                                                                                            |
| Henrik                            | Reschreiter |                       |                  | Poole Hospital          | Poole, United Kingdom                    | Principal Investigator                                  |                                                                                            |
| Suzanne                           | Roffe       |                       |                  | Poole Hospital          | Poole, United Kingdom                    | Research Coordinator                                    |                                                                                            |
| Sarah                             | Savage      |                       |                  | Poole Hospital          | Poole, United Kingdom                    | Research Coordinator                                    |                                                                                            |
| Emma                              | Clarey      |                       |                  | Princess Royal Hospital | Haywards Heath, United Kingdom           | Research Coordinator                                    |                                                                                            |
| Maeve                             | Cockrell    |                       |                  | Princess Royal Hospital | Haywards Heath, United Kingdom           | Research Coordinator                                    |                                                                                            |
| Ele                               | Corcoran    |                       |                  | Princess Royal Hospital | Haywards Heath, United Kingdom           | Research Coordinator                                    |                                                                                            |
| Maria                             | Depante     |                       |                  | Princess Royal Hospital | Haywards Heath, United Kingdom           | Research Coordinator                                    |                                                                                            |
| Clare                             | Finney      |                       |                  | Princess Royal Hospital | Haywards Heath, United Kingdom           | Research Coordinator                                    |                                                                                            |
| Reena                             | Mehta       |                       |                  | Princess Royal Hospital | Haywards Heath, United Kingdom           | Principal Investigator                                  |                                                                                            |
| Harriet                           | Noble       |                       |                  | Princess Royal Hospital | Haywards Heath, United Kingdom           | Research Coordinator                                    |                                                                                            |
| Kevin                             | O'Reilly    |                       |                  | Princess Royal Hospital | Haywards Heath, United Kingdom           | Research Coordinator                                    |                                                                                            |



## Supplemental Online Content: Nonauthor Collaborators

\*First name, last name, and suffix (if applicable) are required and will appear in PubMed.

| *First Name and Middle Initial(s) | *Last Name | *Suffix (eg, Jr, III) | Academic Degrees | Institution                         | Location (city, state/province, country) | Role or Contribution, eg, chair, principal investigator | Group (if more than 1 Group listed in the byline) and/or Subgroup (eg, Steering Committee) |
|-----------------------------------|------------|-----------------------|------------------|-------------------------------------|------------------------------------------|---------------------------------------------------------|--------------------------------------------------------------------------------------------|
| John                              | Smith      |                       |                  | Princess Royal Hospital             | Haywards Heath, United Kingdom           | Research Coordinator                                    |                                                                                            |
| Helen                             | Claridge   |                       |                  | Queen Alexandra Hospital            | Portsmouth, United Kingdom               | Research Coordinator                                    |                                                                                            |
| Aimi                              | Collins    |                       |                  | Queen Alexandra Hospital            | Portsmouth, United Kingdom               | Research Coordinator                                    |                                                                                            |
| Zoe                               | Daly       |                       |                  | Queen Alexandra Hospital            | Portsmouth, United Kingdom               | Research Coordinator                                    |                                                                                            |
| Dovy                              | Domingo    |                       |                  | Queen Alexandra Hospital            | Portsmouth, United Kingdom               | Research Coordinator                                    |                                                                                            |
| James                             | McNicholas |                       |                  | Queen Alexandra Hospital            | Portsmouth, United Kingdom               | Principal Investigator                                  |                                                                                            |
| Angie                             | Nown       |                       |                  | Queen Alexandra Hospital            | Portsmouth, United Kingdom               | Research Assistant                                      |                                                                                            |
| Steve                             | Rose       |                       |                  | Queen Alexandra Hospital            | Portsmouth, United Kingdom               | Research Coordinator                                    |                                                                                            |
| Mansoor                           | Bangash    |                       |                  | Queen Elizabeth Hospital Birmingham | Birmingham, United Kingdom               | Co-Investigator                                         |                                                                                            |
| Colin                             | Bergin     |                       |                  | Queen Elizabeth Hospital Birmingham | Birmingham, United Kingdom               | Research Coordinator                                    |                                                                                            |
| Ronald                            | Carrera    |                       |                  | Queen Elizabeth Hospital Birmingham | Birmingham, United Kingdom               | Research Coordinator                                    |                                                                                            |
| Amy                               | Clark      |                       |                  | Queen Elizabeth Hospital Birmingham | Birmingham, United Kingdom               | Research Coordinator                                    |                                                                                            |
| Lauren                            | Cooper     |                       |                  | Queen Elizabeth Hospital Birmingham | Birmingham, United Kingdom               | Research Coordinator                                    |                                                                                            |
| Natalie                           | Dooley     |                       |                  | Queen Elizabeth Hospital Birmingham | Birmingham, United Kingdom               | Research Coordinator                                    |                                                                                            |
| Karen                             | Ellis      |                       |                  | Queen Elizabeth Hospital Birmingham | Birmingham, United Kingdom               | Research Coordinator                                    |                                                                                            |

## Supplemental Online Content: Nonauthor Collaborators

\*First name, last name, and suffix (if applicable) are required and will appear in PubMed.

| *First Name and Middle Initial(s) | *Last Name | *Suffix (eg, Jr, III) | Academic Degrees | Institution                         | Location (city, state/province, country) | Role or Contribution, eg, chair, principal investigator | Group (if more than 1 Group listed in the byline) and/or Subgroup (eg, Steering Committee) |
|-----------------------------------|------------|-----------------------|------------------|-------------------------------------|------------------------------------------|---------------------------------------------------------|--------------------------------------------------------------------------------------------|
| Emma                              | Fellows    |                       |                  | Queen Elizabeth Hospital Birmingham | Birmingham, United Kingdom               | Research Coordinator                                    |                                                                                            |
| Stephanie                         | Goundry    |                       |                  | Queen Elizabeth Hospital Birmingham | Birmingham, United Kingdom               | Research Coordinator                                    |                                                                                            |
| Samantha                          | Harkett    |                       |                  | Queen Elizabeth Hospital Birmingham | Birmingham, United Kingdom               | Research Coordinator                                    |                                                                                            |
| Saffron                           | King       |                       |                  | Queen Elizabeth Hospital Birmingham | Birmingham, United Kingdom               | Research Coordinator                                    |                                                                                            |
| Tracy                             | Mason      |                       |                  | Queen Elizabeth Hospital Birmingham | Birmingham, United Kingdom               | Research Coordinator                                    |                                                                                            |
| Aoife                             | Neal       |                       |                  | Queen Elizabeth Hospital Birmingham | Birmingham, United Kingdom               | Research Coordinator                                    |                                                                                            |
| Alex                              | Newton-Cox |                       |                  | Queen Elizabeth Hospital Birmingham | Birmingham, United Kingdom               | Research Coordinator                                    |                                                                                            |
| Dhruv                             | Parekh     |                       |                  | Queen Elizabeth Hospital Birmingham | Birmingham, United Kingdom               | Principal Investigator                                  |                                                                                            |
| Jaimin                            | Patel      |                       |                  | Queen Elizabeth Hospital Birmingham | Birmingham, United Kingdom               | Co-Investigator                                         |                                                                                            |
| Christopher                       | Sheridan   |                       |                  | Queen Elizabeth Hospital Birmingham | Birmingham, United Kingdom               | Research Coordinator                                    |                                                                                            |
| Hazel                             | Smith      |                       |                  | Queen Elizabeth Hospital Birmingham | Birmingham, United Kingdom               | Research Coordinator                                    |                                                                                            |
| Elaine                            | Spruce     |                       |                  | Queen Elizabeth Hospital Birmingham | Birmingham, United Kingdom               | Research Coordinator                                    |                                                                                            |
| Nikkita                           | Adams      |                       |                  | Queen's Hospital                    | Romford, United Kingdom                  | Research Coordinator                                    |                                                                                            |
| Sam                               | Bosompem   |                       |                  | Queen's Hospital                    | Romford, United Kingdom                  | Pharmacist                                              |                                                                                            |
| Parveen                           | Dugh       |                       |                  | Queen's Hospital                    | Romford, United Kingdom                  | Pharmacist                                              |                                                                                            |

## Supplemental Online Content: Nonauthor Collaborators

\*First name, last name, and suffix (if applicable) are required and will appear in PubMed.

| *First Name and Middle Initial(s) | *Last Name      | *Suffix (eg, Jr, III) | Academic Degrees | Institution                        | Location (city, state/province, country) | Role or Contribution, eg, chair, principal investigator | Group (if more than 1 Group listed in the byline) and/or Subgroup (eg, Steering Committee) |
|-----------------------------------|-----------------|-----------------------|------------------|------------------------------------|------------------------------------------|---------------------------------------------------------|--------------------------------------------------------------------------------------------|
| Aparna                            | George          |                       |                  | Queen's Hospital                   | Romford, United Kingdom                  | Research Coordinator                                    |                                                                                            |
| Nauman                            | Hussain         |                       |                  | Queen's Hospital                   | Romford, United Kingdom                  | Principal Investigator                                  |                                                                                            |
| Mariha                            | Khalid          |                       |                  | Queen's Hospital                   | Romford, United Kingdom                  | Pharmacist                                              |                                                                                            |
| Lace                              | Paulyn Rosaroso |                       |                  | Queen's Hospital                   | Romford, United Kingdom                  | Research Coordinator                                    |                                                                                            |
| Mandeep K                         | Phull           |                       |                  | Queen's Hospital                   | Romford, United Kingdom                  | Co-Investigator                                         |                                                                                            |
| Tatiana                           | Pogreban        |                       |                  | Queen's Hospital                   | Romford, United Kingdom                  | Research Coordinator                                    |                                                                                            |
| Saima                             | Ashraf          |                       |                  | Queen's Medical Centre, Nottingham | Nottingham, United Kingdom               | Research Coordinator                                    |                                                                                            |
| Marc                              | Chikhani        |                       |                  | Queen's Medical Centre, Nottingham | Nottingham, United Kingdom               | Co-Investigator                                         |                                                                                            |
| Amy                               | Clark           |                       |                  | Queen's Medical Centre, Nottingham | Nottingham, United Kingdom               | Research Coordinator                                    |                                                                                            |
| Louise                            | Conner          |                       |                  | Queen's Medical Centre, Nottingham | Nottingham, United Kingdom               | Research Coordinator                                    |                                                                                            |
| Martin                            | Dent            |                       |                  | Queen's Medical Centre, Nottingham | Nottingham, United Kingdom               | Research Coordinator                                    |                                                                                            |
| Daniel                            | Harvey          |                       |                  | Queen's Medical Centre, Nottingham | Nottingham, United Kingdom               | Principal Investigator                                  |                                                                                            |
| Treesa                            | Joseph          |                       |                  | Queen's Medical Centre, Nottingham | Nottingham, United Kingdom               | Research Coordinator                                    |                                                                                            |
| Megan                             | Meredith        |                       |                  | Queen's Medical Centre, Nottingham | Nottingham, United Kingdom               | Research Coordinator                                    |                                                                                            |
| Lucy                              | Morris          |                       |                  | Queen's Medical Centre, Nottingham | Nottingham, United Kingdom               | Research Coordinator                                    |                                                                                            |

## Supplemental Online Content: Nonauthor Collaborators

\*First name, last name, and suffix (if applicable) are required and will appear in PubMed.

| *First Name and Middle Initial(s) | *Last Name      | *Suffix (eg, Jr, III) | Academic Degrees | Institution                        | Location (city, state/province, country) | Role or Contribution, eg, chair, principal investigator | Group (if more than 1 Group listed in the byline) and/or Subgroup (eg, Steering Committee) |
|-----------------------------------|-----------------|-----------------------|------------------|------------------------------------|------------------------------------------|---------------------------------------------------------|--------------------------------------------------------------------------------------------|
| Cecilia                           | Peters          |                       |                  | Queen's Medical Centre, Nottingham | Nottingham, United Kingdom               | Research Coordinator                                    |                                                                                            |
| Lucy                              | Ryan            |                       |                  | Queen's Medical Centre, Nottingham | Nottingham, United Kingdom               | Research Coordinator                                    |                                                                                            |
| Julia                             | Sampson         |                       |                  | Queen's Medical Centre, Nottingham | Nottingham, United Kingdom               | Research Coordinator                                    |                                                                                            |
| Anju                              | Thomas          |                       |                  | Queen's Medical Centre, Nottingham | Nottingham, United Kingdom               | Research Coordinator                                    |                                                                                            |
| Catherine                         | Walton          |                       |                  | Queen's Medical Centre, Nottingham | Nottingham, United Kingdom               | Research Coordinator                                    |                                                                                            |
| Shauna                            | Bartley         |                       |                  | Royal Berkshire Hospital           | Reading, United Kingdom                  | Research Coordinator                                    |                                                                                            |
| Parminder                         | Bhuie           |                       |                  | Royal Berkshire Hospital           | Reading, United Kingdom                  | Research Coordinator                                    |                                                                                            |
| Sabi                              | Gurung Rai      |                       |                  | Royal Berkshire Hospital           | Reading, United Kingdom                  | Research Coordinator                                    |                                                                                            |
| Nicola                            | Jacques         |                       |                  | Royal Berkshire Hospital           | Reading, United Kingdom                  | Research Coordinator                                    |                                                                                            |
| Andrew                            | Walden          |                       |                  | Royal Berkshire Hospital           | Reading, United Kingdom                  | Principal Investigator                                  |                                                                                            |
| Madhu                             | Balasubramaniam |                       |                  | Royal Bolton Hospital              | Bolton, United Kingdom                   | Principal Investigator                                  |                                                                                            |
| Hugo                              | Buckley         |                       |                  | Royal Bolton Hospital              | Bolton, United Kingdom                   | Principal Investigator                                  |                                                                                            |
| Scott                             | Latham          |                       |                  | Royal Bolton Hospital              | Bolton, United Kingdom                   | Co-Investigator                                         |                                                                                            |
| Emily                             | Bevan           |                       |                  | Royal Hampshire County Hospital    | Winchester, United Kingdom               | Co-Investigator                                         |                                                                                            |
| Arthur                            | Goldsmith       |                       |                  | Royal Hampshire County Hospital    | Winchester, United Kingdom               | Principal Investigator                                  |                                                                                            |
| Irina                             | Greco           |                       |                  | Royal Hampshire County Hospital    | Winchester, United Kingdom               | Co-investigator                                         |                                                                                            |

## Supplemental Online Content: Nonauthor Collaborators

\*First name, last name, and suffix (if applicable) are required and will appear in PubMed.

| *First Name and Middle Initial(s) | *Last Name  | *Suffix (eg, Jr, III) | Academic Degrees | Institution                             | Location (city, state/province, country) | Role or Contribution, eg, chair, principal investigator | Group (if more than 1 Group listed in the byline) and/or Subgroup (eg, Steering Committee) |
|-----------------------------------|-------------|-----------------------|------------------|-----------------------------------------|------------------------------------------|---------------------------------------------------------|--------------------------------------------------------------------------------------------|
| Jane                              | Martin      |                       |                  | Royal Hampshire County Hospital         | Winchester, United Kingdom               | Research Coordinator                                    |                                                                                            |
| Dawn                              | Trodd       |                       |                  | Royal Hampshire County Hospital         | Winchester, United Kingdom               | Research Coordinator                                    |                                                                                            |
| Simon                             | Williams    |                       |                  | Royal Hampshire County Hospital         | Winchester, United Kingdom               | Co-Investigator                                         |                                                                                            |
| Caroline                          | Wrey Brown  |                       |                  | Royal Hampshire County Hospital         | Winchester, United Kingdom               | Research Coordinator                                    |                                                                                            |
| Amaia                             | Arrieta     |                       |                  | Royal London Hospital, Barts Health NHS | London, United Kingdom                   | Research Manager                                        |                                                                                            |
| Maria                             | Fernandez   |                       |                  | Royal London Hospital, Barts Health NHS | London, United Kingdom                   | Research Coordinator                                    |                                                                                            |
| Alex                              | Fowler      |                       |                  | Royal London Hospital, Barts Health NHS | London, United Kingdom                   | Co-Investigator                                         |                                                                                            |
| Ryan                              | Haines      |                       |                  | Royal London Hospital, Barts Health NHS | London, United Kingdom                   | Co-Investigator                                         |                                                                                            |
| Mareena                           | Joseph      |                       |                  | Royal London Hospital, Barts Health NHS | London, United Kingdom                   | Research Coordinator                                    |                                                                                            |
| Tim                               | Martin      |                       |                  | Royal London Hospital, Barts Health NHS | London, United Kingdom                   | Research Coordinator                                    |                                                                                            |
| Filipa                            | Santos      |                       |                  | Royal London Hospital, Barts Health NHS | London, United Kingdom                   | Research Coordinator                                    |                                                                                            |
| Fatima                            | Seidu       |                       |                  | Royal London Hospital, Barts Health NHS | London, United Kingdom                   | Research Coordinator                                    |                                                                                            |
| Ruzena                            | Uddin       |                       |                  | Royal London Hospital, Barts Health NHS | London, United Kingdom                   | Research Coordinator                                    |                                                                                            |
| Parjam                            | Zolfaghari  |                       |                  | Royal London Hospital, Barts Health NHS | London, United Kingdom                   | Principal Investigator                                  |                                                                                            |
| Claudio                           | Addari      |                       |                  | Royal Marsden Hospital                  | London, United Kingdom                   | Co-investigator                                         |                                                                                            |
| Sekina                            | Bakare      |                       |                  | Royal Marsden Hospital                  | London, United Kingdom                   | Co-investigator                                         |                                                                                            |
| Lauren                            | Barraclough |                       |                  | Royal Marsden Hospital                  | London, United Kingdom                   | Co-investigator                                         |                                                                                            |

## Supplemental Online Content: Nonauthor Collaborators

\*First name, last name, and suffix (if applicable) are required and will appear in PubMed.

| *First Name and Middle Initial(s) | *Last Name      | *Suffix (eg, Jr, III) | Academic Degrees | Institution            | Location (city, state/province, country) | Role or Contribution, eg, chair, principal investigator | Group (if more than 1 Group listed in the byline) and/or Subgroup (eg, Steering Committee) |
|-----------------------------------|-----------------|-----------------------|------------------|------------------------|------------------------------------------|---------------------------------------------------------|--------------------------------------------------------------------------------------------|
| Thomas                            | Bemand          |                       |                  | Royal Marsden Hospital | London, United Kingdom                   | Co-investigator                                         |                                                                                            |
| Ethel                             | Black           |                       |                  | Royal Marsden Hospital | London, United Kingdom                   | Research Coordinator                                    |                                                                                            |
| Matt                              | Clayton         |                       |                  | Royal Marsden Hospital | London, United Kingdom                   | Co-investigator                                         |                                                                                            |
| Arnold                            | Dela Rosa       |                       |                  | Royal Marsden Hospital | London, United Kingdom                   | Research Coordinator                                    |                                                                                            |
| Luke                              | Edwards         |                       |                  | Royal Marsden Hospital | London, United Kingdom                   | Co-investigator                                         |                                                                                            |
| Hugh                              | Furness         |                       |                  | Royal Marsden Hospital | London, United Kingdom                   | Co-investigator                                         |                                                                                            |
| Richard                           | Gordon-Williams |                       |                  | Royal Marsden Hospital | London, United Kingdom                   | Principal Investigator                                  |                                                                                            |
| Nicole                            | Greenshields    |                       |                  | Royal Marsden Hospital | London, United Kingdom                   | Co-investigator                                         |                                                                                            |
| Natalie                           | Hester          |                       |                  | Royal Marsden Hospital | London, United Kingdom                   | Co-investigator                                         |                                                                                            |
| Francesca                         | Holden          |                       |                  | Royal Marsden Hospital | London, United Kingdom                   | Co-investigator                                         |                                                                                            |
| Ryan                              | Howle           |                       |                  | Royal Marsden Hospital | London, United Kingdom                   | Co-investigator                                         |                                                                                            |
| Emma                              | Hunt            |                       |                  | Royal Marsden Hospital | London, United Kingdom                   | Co-investigator                                         |                                                                                            |
| Aatif                             | Husain          |                       |                  | Royal Marsden Hospital | London, United Kingdom                   | Co-investigator                                         |                                                                                            |
| Sultan                            | Iqbal           |                       |                  | Royal Marsden Hospital | London, United Kingdom                   | Co-investigator                                         |                                                                                            |
| Venkateswaran                     | Jambunathan     |                       |                  | Royal Marsden Hospital | London, United Kingdom                   | Co-investigator                                         |                                                                                            |
| Shaman                            | Jhanji          |                       |                  | Royal Marsden Hospital | London, United Kingdom                   | Co-investigator                                         |                                                                                            |
| Ahalya                            | Kadirvelarasan  |                       |                  | Royal Marsden Hospital | London, United Kingdom                   | Co-investigator                                         |                                                                                            |
| Harriet                           | Kemp            |                       |                  | Royal Marsden Hospital | London, United Kingdom                   | Co-investigator                                         |                                                                                            |
| Suzannah                          | Lant            |                       |                  | Royal Marsden Hospital | London, United Kingdom                   | Co-investigator                                         |                                                                                            |
| Sarah                             | Loftus          |                       |                  | Royal Marsden Hospital | London, United Kingdom                   | Co-investigator                                         |                                                                                            |
| Sam                               | Maese           |                       |                  | Royal Marsden Hospital | London, United Kingdom                   | Co-investigator                                         |                                                                                            |
| Laura                             | Matthews        |                       |                  | Royal Marsden Hospital | London, United Kingdom                   | Co-investigator                                         |                                                                                            |
| Olivia                            | Morley          |                       |                  | Royal Marsden Hospital | London, United Kingdom                   | Co-investigator                                         |                                                                                            |
| Kshiteeja                         | Naik            |                       |                  | Royal Marsden Hospital | London, United Kingdom                   | Co-investigator                                         |                                                                                            |
| Isabel                            | Norris          |                       |                  | Royal Marsden Hospital | London, United Kingdom                   | Co-investigator                                         |                                                                                            |
| Nicola                            | Ocean           |                       |                  | Royal Marsden Hospital | London, United Kingdom                   | Co-investigator                                         |                                                                                            |
| Luke                              | Parker          |                       |                  | Royal Marsden Hospital | London, United Kingdom                   | Co-investigator                                         |                                                                                            |
| Amee                              | Patel           |                       |                  | Royal Marsden Hospital | London, United Kingdom                   | Co-investigator                                         |                                                                                            |

## Supplemental Online Content: Nonauthor Collaborators

\*First name, last name, and suffix (if applicable) are required and will appear in PubMed.

| *First Name and Middle Initial(s) | *Last Name       | *Suffix (eg, Jr, III) | Academic Degrees | Institution                  | Location (city, state/province, country) | Role or Contribution, eg, chair, principal investigator | Group (if more than 1 Group listed in the byline) and/or Subgroup (eg, Steering Committee) |
|-----------------------------------|------------------|-----------------------|------------------|------------------------------|------------------------------------------|---------------------------------------------------------|--------------------------------------------------------------------------------------------|
| Shivali                           | Patel            |                       |                  | Royal Marsden Hospital       | London, United Kingdom                   | Co-investigator                                         |                                                                                            |
| Ravishankar                       | Raobaikady       |                       |                  | Royal Marsden Hospital       | London, United Kingdom                   | Co-investigator                                         |                                                                                            |
| Martin                            | Shao Foong Chong |                       |                  | Royal Marsden Hospital       | London, United Kingdom                   | Co-investigator                                         |                                                                                            |
| William                           | Sherwood         |                       |                  | Royal Marsden Hospital       | London, United Kingdom                   | Co-investigator                                         |                                                                                            |
| Sam                               | Smith            |                       |                  | Royal Marsden Hospital       | London, United Kingdom                   | Co-investigator                                         |                                                                                            |
| Prakhar                           | Srilastava       |                       |                  | Royal Marsden Hospital       | London, United Kingdom                   | Co-investigator                                         |                                                                                            |
| Sharjeel                          | Tahir            |                       |                  | Royal Marsden Hospital       | London, United Kingdom                   | Co-investigator                                         |                                                                                            |
| Shamil                            | Tanna            |                       |                  | Royal Marsden Hospital       | London, United Kingdom                   | Co-investigator                                         |                                                                                            |
| Kate                              | Tatham           |                       |                  | Royal Marsden Hospital       | London, United Kingdom                   | Co-investigator                                         |                                                                                            |
| Benjamin                          | Thomas           |                       |                  | Royal Marsden Hospital       | London, United Kingdom                   | Co-investigator                                         |                                                                                            |
| Pete                              | Thomas           |                       |                  | Royal Marsden Hospital       | London, United Kingdom                   | Co-investigator                                         |                                                                                            |
| Shree                             | Voralia          |                       |                  | Royal Marsden Hospital       | London, United Kingdom                   | Co-investigator                                         |                                                                                            |
| Kritchai                          | Vutipongsatorn   |                       |                  | Royal Marsden Hospital       | London, United Kingdom                   | Co-investigator                                         |                                                                                            |
| Zoszka                            | Webb             |                       |                  | Royal Marsden Hospital       | London, United Kingdom                   | Co-investigator                                         |                                                                                            |
| Tanith                            | Westerman        |                       |                  | Royal Marsden Hospital       | London, United Kingdom                   | Co-investigator                                         |                                                                                            |
| Alasdair                          | Wills            |                       |                  | Royal Marsden Hospital       | London, United Kingdom                   | Co-investigator                                         |                                                                                            |
| Hafsana                           | Ali              |                       |                  | Royal Surrey County Hospital | Guildford, United Kingdom                | Research Coordinator                                    |                                                                                            |
| Michele                           | Bossy            |                       |                  | Royal Surrey County Hospital | Guildford, United Kingdom                | Co-Investigator                                         |                                                                                            |
| Naomi                             | Boyer            |                       |                  | Royal Surrey County Hospital | Guildford, United Kingdom                | Co-Investigator                                         |                                                                                            |
| Letitia                           | Bullman          |                       |                  | Royal Surrey County Hospital | Guildford, United Kingdom                | Co-Investigator                                         |                                                                                            |
| Dorota                            | Burda            |                       |                  | Royal Surrey County Hospital | Guildford, United Kingdom                | Research Coordinator                                    |                                                                                            |
| Paula                             | Carveli          |                       |                  | Royal Surrey County Hospital | Guildford, United Kingdom                | Research Coordinator                                    |                                                                                            |

## Supplemental Online Content: Nonauthor Collaborators

\*First name, last name, and suffix (if applicable) are required and will appear in PubMed.

| *First Name and Middle Initial(s) | *Last Name  | *Suffix (eg, Jr, III) | Academic Degrees | Institution                  | Location (city, state/province, country) | Role or Contribution, eg, chair, principal investigator | Group (if more than 1 Group listed in the byline) and/or Subgroup (eg, Steering Committee) |
|-----------------------------------|-------------|-----------------------|------------------|------------------------------|------------------------------------------|---------------------------------------------------------|--------------------------------------------------------------------------------------------|
| Sandra                            | Chmielewska |                       |                  | Royal Surrey County Hospital | Guildford, United Kingdom                | Data Manager                                            |                                                                                            |
| Daniel                            | Cottam      |                       |                  | Royal Surrey County Hospital | Guildford, United Kingdom                | Co-Investigator                                         |                                                                                            |
| Nichalus                          | Dawson      |                       |                  | Royal Surrey County Hospital | Guildford, United Kingdom                | Research Coordinator                                    |                                                                                            |
| Jeanny                            | Del Socorro |                       |                  | Royal Surrey County Hospital | Guildford, United Kingdom                | Research Coordinator                                    |                                                                                            |
| Lui                               | Forni       |                       |                  | Royal Surrey County Hospital | Guildford, United Kingdom                | Co-Investigator                                         |                                                                                            |
| James                             | Hilton      |                       |                  | Royal Surrey County Hospital | Guildford, United Kingdom                | Co-Investigator                                         |                                                                                            |
| Sherin                            | John        |                       |                  | Royal Surrey County Hospital | Guildford, United Kingdom                | Research Coordinator                                    |                                                                                            |
| Justin                            | Kirk-Bayley |                       |                  | Royal Surrey County Hospital | Guildford, United Kingdom                | Principal Investigator                                  |                                                                                            |
| Donna                             | May Sanga   |                       |                  | Royal Surrey County Hospital | Guildford, United Kingdom                | Research Coordinator                                    |                                                                                            |
| Kathryn                           | Mcintosh    |                       |                  | Royal Surrey County Hospital | Guildford, United Kingdom                | Research Coordinator                                    |                                                                                            |
| Jame                              | McKinley    |                       |                  | Royal Surrey County Hospital | Guildford, United Kingdom                | Co-Investigator                                         |                                                                                            |
| Rugaia                            | Montaser    |                       |                  | Royal Surrey County Hospital | Guildford, United Kingdom                | Research Assistant                                      |                                                                                            |
| Tahir                             | Nasser      |                       |                  | Royal Surrey County Hospital | Guildford, United Kingdom                | Co-Investigator                                         |                                                                                            |
| Razan                             | Nour        |                       |                  | Royal Surrey County Hospital | Guildford, United Kingdom                | Co-Investigator                                         |                                                                                            |
| Elizabeth                         | Poter       |                       |                  | Royal Surrey County Hospital | Guildford, United Kingdom                | Co-Investigator                                         |                                                                                            |



## Supplemental Online Content: Nonauthor Collaborators

\*First name, last name, and suffix (if applicable) are required and will appear in PubMed.

| *First Name and Middle Initial(s) | *Last Name | *Suffix (eg, Jr, III) | Academic Degrees | Institution                  | Location (city, state/province, country) | Role or Contribution, eg, chair, principal investigator | Group (if more than 1 Group listed in the byline) and/or Subgroup (eg, Steering Committee) |
|-----------------------------------|------------|-----------------------|------------------|------------------------------|------------------------------------------|---------------------------------------------------------|--------------------------------------------------------------------------------------------|
| Stephanie                         | Rouse      |                       |                  | Royal Surrey County Hospital | Guildford, United Kingdom                | Pharmacist                                              |                                                                                            |
| Armored                           | Salberg    |                       |                  | Royal Surrey County Hospital | Guildford, United Kingdom                | Research Coordinator                                    |                                                                                            |
| Joe                               | Tooley     |                       |                  | Royal Surrey County Hospital | Guildford, United Kingdom                | Pharmacist                                              |                                                                                            |
| Emma                              | Tyson      |                       |                  | Royal Surrey County Hospital | Guildford, United Kingdom                | Co-Investigator                                         |                                                                                            |
| Jerik                             | Verula     |                       |                  | Royal Surrey County Hospital | Guildford, United Kingdom                | Research Coordinator                                    |                                                                                            |
| Eva                               | Wilson     |                       |                  | Royal Surrey County Hospital | Guildford, United Kingdom                | Research Coordinator                                    |                                                                                            |
| Waldtraud                         | Wutte      |                       |                  | Royal Surrey County Hospital | Guildford, United Kingdom                | Data Manager                                            |                                                                                            |
| Lauren                            | Butler     |                       |                  | Royal Victoria Infirmary     | Newcastle upon Tyne, United Kingdom      | Research Coordinator                                    |                                                                                            |
| Leigh                             | Dunn       |                       |                  | Royal Victoria Infirmary     | Newcastle upon Tyne, United Kingdom      | Research Coordinator                                    |                                                                                            |
| Arti                              | Gulati     |                       |                  | Royal Victoria Infirmary     | Newcastle upon Tyne, United Kingdom      | Research Coordinator                                    |                                                                                            |
| Jonathan                          | Shelton    |                       |                  | Royal Victoria Infirmary     | Newcastle upon Tyne, United Kingdom      | Principal Investigator                                  |                                                                                            |
| Emma                              | Boxall     |                       |                  | Salford Royal Hospital       | Salford, United Kingdom                  | Pharmacist                                              |                                                                                            |
| Kathryn                           | Cawley     |                       |                  | Salford Royal Hospital       | Salford, United Kingdom                  | Research Coordinator                                    |                                                                                            |
| Joy                               | Dearden    |                       |                  | Salford Royal Hospital       | Salford, United Kingdom                  | Research Coordinator                                    |                                                                                            |
| Reece                             | Doonan     |                       |                  | Salford Royal Hospital       | Salford, United Kingdom                  | Research Coordinator                                    |                                                                                            |
| John                              | MacDonald  |                       |                  | Salford Royal Hospital       | Salford, United Kingdom                  | Principal Investigator                                  |                                                                                            |

## Supplemental Online Content: Nonauthor Collaborators

\*First name, last name, and suffix (if applicable) are required and will appear in PubMed.

| *First Name and Middle Initial(s) | *Last Name   | *Suffix (eg, Jr, III) | Academic Degrees | Institution                  | Location (city, state/province, country) | Role or Contribution, eg, chair, principal investigator | Group (if more than 1 Group listed in the byline) and/or Subgroup (eg, Steering Committee) |
|-----------------------------------|--------------|-----------------------|------------------|------------------------------|------------------------------------------|---------------------------------------------------------|--------------------------------------------------------------------------------------------|
| Danielle                          | McLaughlan   |                       |                  | Salford Royal Hospital       | Salford, United Kingdom                  | Research Coordinator                                    |                                                                                            |
| Alice                             | Baker        |                       |                  | Southampton General Hospital | Southampton, Hampshire, United Kingdom   | Research Coordinator                                    |                                                                                            |
| Clare                             | Bolger       |                       |                  | Southampton General Hospital | Southampton, Hampshire, United Kingdom   | Research Coordinator                                    |                                                                                            |
| Rachel                            | Burnish      |                       |                  | Southampton General Hospital | Southampton, Hampshire, United Kingdom   | Research Coordinator                                    |                                                                                            |
| Michael                           | Carter       |                       |                  | Southampton General Hospital | Southampton, Hampshire, United Kingdom   | Research Coordinator                                    |                                                                                            |
| Rebecca                           | Cusack       |                       |                  | Southampton General Hospital | Southampton, Hampshire, United Kingdom   | Principal Investigator                                  |                                                                                            |
| Susan                             | Jackson      |                       |                  | Southampton General Hospital | Southampton, Hampshire, United Kingdom   | Research Coordinator                                    |                                                                                            |
| Karen                             | Salmon       |                       |                  | Southampton General Hospital | Southampton, Hampshire, United Kingdom   | Research Coordinator                                    |                                                                                            |
| Lijun                             | Ding         |                       |                  | St George's Hospitals        | London, United Kingdom                   | Research Coordinator                                    |                                                                                            |
| Sarah                             | Farnell Ward |                       |                  | St George's Hospitals        | London, United Kingdom                   | Research Manager                                        |                                                                                            |
| Helen                             | Farrah       |                       |                  | St George's Hospitals        | London, United Kingdom                   | Research Coordinator                                    |                                                                                            |
| Geraldine                         | Gray         |                       |                  | St George's Hospitals        | London, United Kingdom                   | Research Coordinator                                    |                                                                                            |

## Supplemental Online Content: Nonauthor Collaborators

\*First name, last name, and suffix (if applicable) are required and will appear in PubMed.

| *First Name and Middle Initial(s) | *Last Name         | *Suffix (eg, Jr, III) | Academic Degrees | Institution               | Location (city, state/province, country) | Role or Contribution, eg, chair, principal investigator | Group (if more than 1 Group listed in the byline) and/or Subgroup (eg, Steering Committee) |
|-----------------------------------|--------------------|-----------------------|------------------|---------------------------|------------------------------------------|---------------------------------------------------------|--------------------------------------------------------------------------------------------|
| Pamela                            | Kabungo            |                       |                  | St George's Hospitals     | London, United Kingdom                   | Research Coordinator                                    |                                                                                            |
| Susannah                          | Leaver             |                       |                  | St George's Hospitals     | London, United Kingdom                   | Principal Investigator                                  |                                                                                            |
| Romina                            | Pepermans Saluzzio |                       |                  | St George's Hospitals     | London, United Kingdom                   | Research Coordinator                                    |                                                                                            |
| Christine                         | Sicat              |                       |                  | St George's Hospitals     | London, United Kingdom                   | Research Coordinator                                    |                                                                                            |
| Maria                             | Thanasi            |                       |                  | St George's Hospitals     | London, United Kingdom                   | Research Coordinator                                    |                                                                                            |
| Vince                             | Ventura            |                       |                  | St George's Hospitals     | London, United Kingdom                   | Research Coordinator                                    |                                                                                            |
| Nikki                             | Yun                |                       |                  | St George's Hospitals     | London, United Kingdom                   | Research Coordinator                                    |                                                                                            |
| Dorota                            | Banach             |                       |                  | St Mary's Hospital London | London, United Kingdom                   | Research Coordinator                                    |                                                                                            |
| Anthony                           | Gordon             |                       |                  | St Mary's Hospital London | London, United Kingdom                   | Principal Investigator                                  |                                                                                            |
| Amal                              | Mohammed           |                       |                  | St Mary's Hospital London | London, United Kingdom                   | Research Coordinator                                    |                                                                                            |
| Ehsan                             | Ahmadnia           |                       |                  | St Thomas' Hospital       | London, United Kingdom                   | Co-Investigator                                         |                                                                                            |
| Mike                              | Barker             |                       |                  | St Thomas' Hospital       | London, United Kingdom                   | Co-Investigator                                         |                                                                                            |
| Aneta                             | Bociek             |                       |                  | St Thomas' Hospital       | London, United Kingdom                   | Research Coordinator                                    |                                                                                            |
| Lynda                             | Cameron            |                       |                  | St Thomas' Hospital       | London, United Kingdom                   | Co-Investigator                                         |                                                                                            |
| Fabiola                           | D'Amato            |                       |                  | St Thomas' Hospital       | London, United Kingdom                   | Research Coordinator                                    |                                                                                            |
| Fraser                            | Hanks              |                       |                  | St Thomas' Hospital       | London, United Kingdom                   | Co-Investigator                                         |                                                                                            |
| Sarah                             | Khorshid           |                       |                  | St Thomas' Hospital       | London, United Kingdom                   | Co-Investigator                                         |                                                                                            |
| Rosario                           | Lim                |                       |                  | St Thomas' Hospital       | London, United Kingdom                   | Research Coordinator                                    |                                                                                            |
| Shelley                           | Lorah              |                       |                  | St Thomas' Hospital       | London, United Kingdom                   | Research Coordinator                                    |                                                                                            |

## Supplemental Online Content: Nonauthor Collaborators

\*First name, last name, and suffix (if applicable) are required and will appear in PubMed.

| *First Name and Middle Initial(s) | *Last Name       | *Suffix (eg, Jr, III) | Academic Degrees | Institution               | Location (city, state/province, country) | Role or Contribution, eg, chair, principal investigator | Group (if more than 1 Group listed in the byline) and/or Subgroup (eg, Steering Committee) |
|-----------------------------------|------------------|-----------------------|------------------|---------------------------|------------------------------------------|---------------------------------------------------------|--------------------------------------------------------------------------------------------|
| Kyma                              | Morera           |                       |                  | St Thomas' Hospital       | London, United Kingdom                   | Research Coordinator                                    |                                                                                            |
| Marlies                           | Ostermann        |                       |                  | St Thomas' Hospital       | London, United Kingdom                   | Principal Investigator                                  |                                                                                            |
| Gill                              | Radcliffe        |                       |                  | St Thomas' Hospital       | London, United Kingdom                   | Research Manager                                        |                                                                                            |
| Chris                             | Remington        |                       |                  | St Thomas' Hospital       | London, United Kingdom                   | Co-Investigator                                         |                                                                                            |
| Natasha                           | Thaladi          |                       |                  | St Thomas' Hospital       | London, United Kingdom                   | Co-Investigator                                         |                                                                                            |
| Duncan                            | Wyncoll          |                       |                  | St Thomas' Hospital       | London, United Kingdom                   | Co-Investigator                                         |                                                                                            |
| Judith                            | Abrams           |                       |                  | Stoke Mandeville Hospital | Aylesbury, United Kingdom                | Research Coordinator                                    |                                                                                            |
| Oliver                            | Dare             |                       |                  | Stoke Mandeville Hospital | Aylesbury, United Kingdom                | Co-Investigator                                         |                                                                                            |
| Geraldine                         | Hambrook         |                       |                  | Stoke Mandeville Hospital | Aylesbury, United Kingdom                | Research Coordinator                                    |                                                                                            |
| Katarina                          | Manso            |                       |                  | Stoke Mandeville Hospital | Aylesbury, United Kingdom                | Research Coordinator                                    |                                                                                            |
| Elizabeth                         | McKerrow         |                       |                  | Stoke Mandeville Hospital | Aylesbury, United Kingdom                | Research Coordinator                                    |                                                                                            |
| Pradeep                           | Shanmugasundaram |                       |                  | Stoke Mandeville Hospital | Aylesbury, United Kingdom                | Principal Investigator                                  |                                                                                            |
| Sarah                             | Cornell          |                       |                  | Sunderland Royal Hospital | Sunderland, United Kingdom               | Research Coordinator                                    |                                                                                            |
| Alistair                          | Roy              |                       |                  | Sunderland Royal Hospital | Sunderland, United Kingdom               | Principal Investigator                                  |                                                                                            |
| Lindsey                           | Woods            |                       |                  | Sunderland Royal Hospital | Sunderland, United Kingdom               | Research Coordinator                                    |                                                                                            |
| Rebecca                           | Collins          |                       |                  | Tunbridge Wells Hospital  | Tunbridge Wells, United Kingdom          | Co-Investigator                                         |                                                                                            |
| Hayley                            | Dolan            |                       |                  | Tunbridge Wells Hospital  | Tunbridge Wells, United Kingdom          | Co-Investigator                                         |                                                                                            |
| Paul                              | Hayden           |                       |                  | Tunbridge Wells Hospital  | Tunbridge Wells, United Kingdom          | Principal Investigator                                  |                                                                                            |

## Supplemental Online Content: Nonauthor Collaborators

\*First name, last name, and suffix (if applicable) are required and will appear in PubMed.

| *First Name and Middle Initial(s) | *Last Name  | *Suffix (eg, Jr, III) | Academic Degrees | Institution                    | Location (city, state/province, country) | Role or Contribution, eg, chair, principal investigator | Group (if more than 1 Group listed in the byline) and/or Subgroup (eg, Steering Committee) |
|-----------------------------------|-------------|-----------------------|------------------|--------------------------------|------------------------------------------|---------------------------------------------------------|--------------------------------------------------------------------------------------------|
| Thomas                            | Billyward   |                       |                  | University Hospitals Coventry  | Coventry, United Kingdom                 | Principal Investigator                                  |                                                                                            |
| Pamela                            | Bremmer     |                       |                  | University Hospitals Coventry  | Coventry, United Kingdom                 | Research Coordinator                                    |                                                                                            |
| Carl                              | Hawkins     |                       |                  | University Hospitals Coventry  | Coventry, United Kingdom                 | Research Coordinator                                    |                                                                                            |
| Sophie                            | Jackson     |                       |                  | University Hospitals Coventry  | Coventry, United Kingdom                 | Research Coordinator                                    |                                                                                            |
| Geraldine                         | Ward        |                       |                  | University Hospitals Coventry  | Coventry, United Kingdom                 | Research Coordinator                                    |                                                                                            |
| Michele                           | Clark       |                       |                  | University Hospital North Tees | Stockton-on-Tees, United Kingdom         | Research Coordinator                                    |                                                                                            |
| Vijay                             | Jagannathan |                       |                  | University Hospital North Tees | Stockton-on-Tees, United Kingdom         | Principal Investigator                                  |                                                                                            |
| Sarah                             | Purvis      |                       |                  | University Hospital North Tees | Stockton-on-Tees, United Kingdom         | Research Coordinator                                    |                                                                                            |
| Pam                               | Race        |                       |                  | University Hospital North Tees | Stockton-on-Tees, United Kingdom         | Research Coordinator                                    |                                                                                            |
| Thomas                            | Robb        |                       |                  | University Hospital North Tees | Stockton-on-Tees, United Kingdom         | Co-Investigator                                         |                                                                                            |
| Simon                             | Sinclair    |                       |                  | University Hospital North Tees | Stockton-on-Tees, United Kingdom         | Research Coordinator                                    |                                                                                            |
| Jenny                             | Brooks      |                       |                  | University Hospital of Wales   | Cardiff, United Kingdom                  | Research Coordinator                                    |                                                                                            |
| Jade                              | Cole        |                       |                  | University Hospital of Wales   | Cardiff, United Kingdom                  | Research Coordinator                                    |                                                                                            |
| Michelle                          | Davies      |                       |                  | University Hospital of Wales   | Cardiff, United Kingdom                  | Research Coordinator                                    |                                                                                            |
| Rhys                              | Davies      |                       |                  | University Hospital of Wales   | Cardiff, United Kingdom                  | Research Coordinator                                    |                                                                                            |

## Supplemental Online Content: Nonauthor Collaborators

\*First name, last name, and suffix (if applicable) are required and will appear in PubMed.

| *First Name and Middle Initial(s) | *Last Name | *Suffix (eg, Jr, III) | Academic Degrees | Institution                  | Location (city, state/province, country) | Role or Contribution, eg, chair, principal investigator | Group (if more than 1 Group listed in the byline) and/or Subgroup (eg, Steering Committee) |
|-----------------------------------|------------|-----------------------|------------------|------------------------------|------------------------------------------|---------------------------------------------------------|--------------------------------------------------------------------------------------------|
| Helen                             | Hill       |                       |                  | University Hospital of Wales | Cardiff, United Kingdom                  | Research Coordinator                                    |                                                                                            |
| Matt                              | Morgan     |                       |                  | University Hospital of Wales | Cardiff, United Kingdom                  | Co-Investigator                                         |                                                                                            |
| Craig                             | Spencer    |                       |                  | University Hospital of Wales | Cardiff, United Kingdom                  | Principal Investigator                                  |                                                                                            |
| Emma                              | Thomas     |                       |                  | University Hospital of Wales | Cardiff, United Kingdom                  | Research Coordinator                                    |                                                                                            |
| Angharad                          | Williams   |                       |                  | University Hospital of Wales | Cardiff, United Kingdom                  | Research Coordinator                                    |                                                                                            |
| Chiara                            | Ellis      |                       |                  | Watford General Hospital     | Watford, United Kingdom                  | Research Assistant                                      |                                                                                            |
| Elvira                            | Hoxha      |                       |                  | Watford General Hospital     | Watford, United Kingdom                  | Research Coordinator                                    |                                                                                            |
| Valerie                           | Page       |                       |                  | Watford General Hospital     | Watford, United Kingdom                  | Principal Investigator                                  |                                                                                            |
| Xiaobei                           | Zhao       |                       |                  | Watford General Hospital     | Watford, United Kingdom                  | Research Coordinator                                    |                                                                                            |
| Nick                              | Ivin       |                       |                  | Whittington Hospital         | London, United Kingdom                   | Co-Investigator                                         |                                                                                            |
| Rachel                            | Johnston   |                       |                  | Whittington Hospital         | London, United Kingdom                   | Research Coordinator                                    |                                                                                            |
| Louise                            | Ma         |                       |                  | Whittington Hospital         | London, United Kingdom                   | Principal Investigator                                  |                                                                                            |
| Anezka                            | Pratley    |                       |                  | Whittington Hospital         | London, United Kingdom                   | Research Coordinator                                    |                                                                                            |
| Aine                              | Ruttledge  |                       |                  | Whittington Hospital         | London, United Kingdom                   | Research Manager                                        |                                                                                            |
| Kathryn                           | Simpson    |                       |                  | Whittington Hospital         | London, United Kingdom                   | Research Coordinator                                    |                                                                                            |
| Greg                              | Barton     |                       |                  | Whiston Hospital             | Prescot, United Kingdom                  | Principal Investigator                                  |                                                                                            |
| Anthony                           | Cochrane   |                       |                  | Whiston Hospital             | Prescot, United Kingdom                  | Co-Investigator                                         |                                                                                            |
| Clare                             | Harrop     |                       |                  | Whiston Hospital             | Prescot, United Kingdom                  | Research Coordinator                                    |                                                                                            |
| Chelcie                           | Jewitt     |                       |                  | Whiston Hospital             | Prescot, United Kingdom                  | Co-Investigator                                         |                                                                                            |
| Charlotte                         | Preston    |                       |                  | Whiston Hospital             | Prescot, United Kingdom                  | Research Assistant                                      |                                                                                            |

Supplemental Online Content: Nonauthor Collaborators

\*First name, last name, and suffix (if applicable) are required and will appear in PubMed.

| <b>*First Name and Middle Initial(s)</b> | <b>*Last Name</b> | <b>*Suffix (eg, Jr, III)</b> | Academic Degrees | Institution      | Location (city, state/province, country) | Role or Contribution, eg, chair, principal investigator | Group (if more than 1 Group listed in the byline) and/or Subgroup (eg, Steering Committee) |
|------------------------------------------|-------------------|------------------------------|------------------|------------------|------------------------------------------|---------------------------------------------------------|--------------------------------------------------------------------------------------------|
| Karen                                    | Shuker            |                              |                  | Whiston Hospital | Prescot, United Kingdom                  | Research Coordinator                                    |                                                                                            |
