# Supplementary material
Source: PubMed Central journal article supplement (PMC11170452)
Supplement: jama-e249779-s005.pdf [file jama-e249779-s005.pdf]

# Data Sharing Statement

Dulhunty. Continuous vs Intermittent  $\beta$ -Lactam Antibiotic Infusions in Critically Ill Patients With Sepsis. *JAMA*. Published June 12, 2024. doi:10.1001/jama.2024.9779

## Data

**Data available:** Yes

**Data types:** Deidentified participant data, Data dictionary

**How to access data:** Contact person: Dr Naomi Hammond,  
[nhammond@georgeinstitute.org.au](mailto:nhammond@georgeinstitute.org.au)

**When available:** With publication

## Supporting Documents

**Document types:** None

## Additional Information

**Who can access the data:** The trial data will be shared in a manner consistent with the Data Sharing Policy of The George Institute for Global Health, which governs appropriate and responsible sharing of the Institute's data for scientific research:

<https://www.georgeinstitute.org.au/data-sharing-policy>

**Types of analyses:** The data sharing will be only for the purposes of health and medical research and within the constraints of the consent under which the data were originally gathered.

**Mechanisms of data availability:** The requester will be required to enter into a Data Sharing Agreement with The George Institute for Global Health (the Institute), which meets the Institute's data sharing requirements.
